# Supplementary material for: Evaluation of fecal samples as a valid source of DNA by comparing paired blood and fecal samples from American bison (Bison bison)
Source: Springer Nature journal article supplement (doi:10.1186/s12863-019-0722-3), 2019-02-26
Supplement: MOESM1 [file 12863_2019_722_MOESM1_ESM.xlsx]

## Sheet: Samples
Matched pair ID	Animal ID	Fecal Sample ID	FTA Sample ID	Collection Date	Sex
Pair 1	81HL-6203	2015004267	2015004213	2015-02-17	female
Pair 2	81HL-6207	2015004268	2015004214	2015-02-17	female
Pair 3	81HL-6208	2015004269	2015004215	2015-02-17	female
Pair 4	81HL-6210	2015004270	2015004216	2015-02-17	female
Pair 5	81HL-6213	2015004271	2015004217	2015-02-17	female
Pair 6	81HL-6216	2015004272	2015004218	2015-02-17	female
Pair 7	81HL-6224	2015004273	2015004219	2015-02-17	female
Pair 8	81HL-6230	2015004274	2015004220	2015-02-17	female
Pair 9	81HL-6231	2015004275	2015004221	2015-02-17	female
Pair 10	81HL-6233	2015004276	2015004222	2015-02-17	female
Pair 11	81HL-6276	2015004277	2015004223	2015-02-18	male
Pair 12	81HL-6287	2015004278	2015004224	2015-02-18	female
Pair 13	81HL-6288	2015004279	2015004225	2015-02-18	female
Pair 14	81HL-6290	2015004280	2015004226	2015-02-18	male
Pair 15	81HL-6291	2015004281	2015004227	2015-02-18	female
Pair 16	81HL-6297	2015004282	2015004228	2015-02-18	male
Pair 17	81HL-6317	2015004283	2015004229	2015-02-19	female
Pair 18	81HL-6326	2015004284	2015004230	2015-02-19	female
Pair 19	81HL-6336	2015004285	2015004231	2015-02-19	female
Pair 20	81HL-6337	2015004286	2015004232	2015-02-19	female
Pair 21	81HL-6346	2015004287	2015004233	2015-02-19	female
Pair 22	81HL-6657	2015004288	2015004234	2015-01-22	female
Pair 23	81HL-6659	2015004289	2015004235	2015-01-22	female
Pair 24	81HL-6664	2015004290	2015004236	2015-01-22	female
Pair 25	81HL-6669	2015004291	2015004237	2015-01-22	female
Pair 26	81HL-6670	2015004292	2015004238	2015-01-22	female
Pair 27	81HL-6723	2015004293	2015004240	2015-01-26	male
Pair 28	81HL-6735	2015004294	2015004241	2015-01-26	male
Pair 29	81HL-6736	2015004295	2015004242	2015-01-26	male
Pair 30	81HL-6740	2015004296	2015004243	2015-01-26	male
Pair 31	81HL-6742	2015004297	2015004244	2015-01-26	male
Pair 32	81HL-6745	2015004298	2015004245	2015-01-26	male
Pair 33	81HL-6790	2015004299	2015004246	2015-02-10	female
Pair 34	81HL-6793	2015004300	2015004247	2015-02-10	female
Pair 35	81HL-6795	2015004301	2015004248	2015-02-10	female
Pair 36	81HL-6796	2015004302	2015004249	2015-02-10	female
Pair 37	81HL-6801	2015004303	2015004250	2015-02-10	female
Pair 38	81HL-6802	2015004304	2015004251	2015-02-10	female
Pair 39	81HL-6810	2015004305	2015004252	2015-02-10	female
Pair 40	81HL-6812	2015004306	2015004253	2015-02-10	female
Pair 41	81HL-6883	2015004309	2015004255	2015-01-20	female
Pair 42	81HL-6895	2015004310	2015004256	2015-01-20	female
Pair 43	81HL-6896	2015004311	2015004257	2015-01-20	female
Pair 44	81HL-6906	2015004312	2015004259	2015-01-20	female
Pair 45	81HL-6952	2015004313	2015004260	2015-01-21	female
Pair 46	81HL-6955	2015004314	2015004261	2015-01-21	female
Pair 47	81HL-6960	2015004315	2015004262	2015-01-21	female
Pair 48	81HL-6964	2015004316	2015004263	2015-01-21	female
Pair 49	81HL-6965	2015004317	2015004264	2015-01-21	female
Pair 50	81HL-6980	2015004318	2015004265	unknown	female
