# Supplementary material for: Evaluation of fecal samples as a valid source of DNA by comparing paired blood and fecal samples from American bison (Bison bison)
Source: Springer Nature journal article supplement (doi:10.1186/s12863-019-0722-3), 2019-02-26
Supplement: MOESM2 [file 12863_2019_722_MOESM2_ESM.xlsx]

## Sheet: Sheet1
Multiplex	Locus	Primer name	Final concentration (μM)	Label	Sequence 5' -> 3'	Allele Size Range (bp)
80	BM1862	BM1862F	5	6-FAM	AAGCAAAAAGGCTGATGGC	199-215
		BM1862R	5	none	TTGCAGATACTGGCAAGTGG
	BMS1001	BMS1001F	5	NED	GAGCCAATTCCTACAATTCTCTT	107-115
		BMS1001R	5	none	AGACATGGCTGAAATGACTGA
	BMS1074	BMS1074F	4	NED	CAGTAGCCAAGATATGGAAGCA	152-160
		BMS1074R	4	none	AGCTCCTTGCTGCTACAAATG
	BMS1675	BMS1675F	10	6-FAM	CATTAGAAAGCTGATTGGAGGG	85-91
		BMS1675R	10	none	TAATAATCAGTGCCGCTCCC
	BMS1716	BMS1716F	20	HEX	GTGGGTTGGAGAGGTACAAG	185-197
		BMS1716R	20	none	AGAAATGGCCTTGAGAAAGAG
	HUJ246	HUJ246F	5	NED	ACTCCAGTTTTCTTTCCTGGG	242-264
		HUJ246R	5	none	TGCCATGTAGTAGCTGTGTGC
82	BM4311	BM4311F	5	6-FAM	TCCACTTCTTCCCTCATCTCC	90-104
		BM4311R	5	none	GAAGTATATGTGTGCCTGGCC
	BM6017	BM6017F	5	HEX	TCTTCTGTTTTCCTCCATCCC	104-122
		BM6017R	5	none	GGAAACTAGCTTATGCTGTGGG
	BM711	BM711F	5	6-FAM	CAGCATCAGCAACTAACATAGG	161-177
		BM711R	5	none	TGGACCATGAGGGAAGTCTC
	INRA189	INRA189F	5	NED	TACACGCATGTCCTTGTTTCGG	96-100
		INRA189R	5	none	CTCTGCATCTGTCCTGGACTGG
	TGLA122	TGLA122F	10	NED	CCCTCCTCCAGGTAAATCAGC	136-150
		TGLA122R	10	none	AATCACATGGCAAATAAGTACATAC
85	BL1036	BL1036F	5	NED	TAGCTTATGCCATTGTTTTTGC	175-193
		BL1036R	5	none	ATCTGATGTGGGTTTCTGACTG
	BM4107	BM4107F	8	HEX	ATAGGCTTTGCATTGTTCAGG	159-185
		BM4107R	8	none	AGCCCCTGCTATTGTGTGAG
	BM47	BM47F	10	6-FAM	ACAGGAAGGAGAAGGGGAAG	103-119
		BM47R	10	none	CCGGGGTCACATGACTCTG
	BMS1315	BMS1315F	5	HEX	AAGCCATTGATTGTAGATTGGG	135-149
		BMS1315R	5	none	GAGTTTCCTTTTTCCCCCAC
	BMS1857	BMS1857F	5	6-FAM	TAATTGATCACAAAGAGGAGCC	142-170
		BMS1857R	5	none	GATCCCAGAGAATCACTCACC
	ILSTS102	ILSTS102F	5	NED	CAGGACTGAGTAACTAAGGC	113-156
		ILSTS102R	5	none	AGGAGACAGCTACAAACCCC
PRTG 1	BM17132	BM17132F	9	6-FAM	ATCTGCCAGTATCACATCAACA	81-103
		BM17132R	9	none	GTTACTTTTCCAGGCATGAAGC
	BMS410	BMS410F	8	NED	GGCTGAAAAGCTGTGGTGTT	81-103
		BMS410R	8	none	TTGCCACATTTACCTTCTTTCA
	BMS510	BMS510F	5	VIC	TGCTGCATGATTCTCATTCC	88-98
		BMS510R	5	none	AGCCTTCCTGTTCTCTGCTG
	BMS527	BMS527F	10	6-FAM	TCAGTGAAAGCAAGAGAAATATCC	159-183
		BMS527R	10	none	TTCCATTCCCTTTGAATATCCC
	RM372	RM372F	15	VIC	TTCAACCCAACATCCACTTG	114-138
		RM372R	15	none	ACTTAGATTTCCAAGCCCAGG
PRTG 2	BM1225	BM1225F	15	NED	TTTCTCAACAGAGGTGTCCAC	233-273
		BM1225R	15	none	ACCCCTATCACCATGCTCTG
	BM1706	BM1706F	6	6-FAM	ACAGGACGGTTTCTCCTTATG	230-256
		BM1706R	6	none	CTTGCAGTTTCCCATACAAGG
	BM1905	BM1905F	8	NED	GTCCATGGGTTCACAAAGAG	170-196
		BM1905R	8	none	ACGCCTGCTGATGCTGTAG
	BM2113	BM2113F	6	6-FAM	GCTGCCTTCTACCAAATACCC	127-153
		BM2113R	6	none	CTTCCTGAGAGAAGCAACACC
	BM4440	BM4440F	5	NED	CCCTGGCATTCAACAAGTGT	121-147
		BM4440R	5	none	CACCCTGTTAGGAATCACTGG
	BM720	BM720F	8	VIC	ACATCTCATTCTTGTGTCATGG	203-239
		BM720R	8	none	GAAATTGACTTTAGGGTTCCCC
PRTY A	BM4513	BM4513F	5	NED	GCGCAAGTTTCCTCATGC	132-134
		BM4513R	5	none	TCAGCAATTCAGTACATCACCC
	BM7145	BM7145F	12	NED	ATTATGTTCCAGATTCCATTCCA	108-112
		BM7145R	12	none	CAGCACTGTTTCATAAACTATGGG
	BMS2270	BMS2270F	2	6-FAM	(GTTTCTT)CTGCGTTAACACCCCACC	66-70
		BMS2270R	2	none	(GTGTCTT)GCAGGAAGGCTGATGCAC
	SPS113	SPS113F	3	VIC	CCTCCACACAGGCTTCTCTGACTT	128-132
		SPS113R	3	none	CCTTAACTTGCTTGAGTTATTGCCC
PRTY BC	AGLA293	AGLA293F	10	VIC	GAAACTCAACCCAAGACAACTCAAG	218-220
		AGLA293R	10	none	ATGACTTTATTCTCCACCTAGCAGA
	BM4307	BM4307F	20	6-FAM	ATAACACAAAAAGTGGAAAACACTC	183-187
		BM4307R	20	none	ATTTTATCTCAGGTCCCTTTTTATC
	CSSM42	CSSM42F	12	NED	GGGAAGGTCCTAACTATGGTTGAG	167-171
		CSSM42R	12	none	ACCCTCACTTCTAACTGCATTGGA
