# Supplementary material for: Evaluation of fecal samples as a valid source of DNA by comparing paired blood and fecal samples from American bison (Bison bison)
Source: Springer Nature journal article supplement (doi:10.1186/s12863-019-0722-3), 2019-02-26
Supplement: MOESM3 [file 12863_2019_722_MOESM3_ESM.xlsx]

## Sheet: Data
Panel	Marker	Total # of samples	Match	Unreadable	No match	Percent matching (excluding unreadable data)	Percent matching (including unreadable data)	Allelic dropout	Neither allele matches	Blood Heterozygosity	Fecal Heterozygosity	Difference	Number of alleles	Allelic richness	Chromosome	Position on Bos taurus chromosome (UMD3.1)	Bos taurus chromosome length	Distance from centromere	Forward primer length	G/C content	Reverse primer length	G/C content	Overall amplicon length	G/C content	Overall length (amplicon + primers)	G/C content
Mix 80	BM1862	50	20	29	1	0.952381	0.4	0	0	0.761905	0.761905	0	10	0.5	17	63026466	75158596	0.83858	19	0.474	20	0.5	162	0.364	201	0.388
Mix 80	BMS1001	50	44	4	2	0.956522	0.88	2	0	0.73913	0.695652	0.0434783	5	0.8	27	10092323	45407902	0.222259	21	0.429	23	0.391	88	0.432	132	0.348
Mix 80	BMS1074	50	26	24	0	1	0.52	0	0	0.692308	0.692308	0	5	0.8	4	82808759	120829699	0.685334	22	0.455	21	0.476	113	0.354	156	0.385
Mix 80	BMS1675	50	32	18	0	1	0.64	0	0	0.1875	0.1875	0	4	0.75	27	41903322	45407902	0.92282	20	0.5	22	0.455	44	0.5	86	0.488
Mix 80	BMS1716	50	32	18	0	1	0.64	0	0	0.03125	0.03125	0	6	0.5	11	42031568	107310763	0.391681	20	0.55	21	0.429	151	0.377	192	0.401
Mix 80	HUJ246	50	18	32	0	1	0.36	0	0	0.444444	0.444444	0	7	0.428571	3	53836300	121430405	0.443351	21	0.476	21	0.524	211	0.441	253	0.451
Mix 82	BM4311	50	45	2	3	0.9375	0.9	2	0	0.791667	0.75	0.0416667	7	0.857143	6	94156599	119458736	0.788193	21	0.524	21	0.524	61	0.525	103	0.524
Mix 82	BM6017	50	41	9	0	1	0.82	0	0	0.414634	0.414634	0	6	0.833333	X	5439138	148823899	0.0365475	22	0.5	21	0.476	77	0.351	120	0.4
Mix 82	BM711	50	36	14	0	1	0.72	0	0	0.388889	0.388889	0	7	0.571429	8	89588575	113384836	0.790128	22	0.455	20	0.55	121	0.322	163	0.368
Mix 82	INRA189	50	47	0	3	0.94	0.94	2	1	n/a	n/a	n/a	3	0.666667	Y
Mix 82	TGLA122	50	26	22	2	0.928571	0.52	2	0	0.678571	0.607143	0.0714286	7	0.714286	21	57640855	71599096	0.80505	21	0.571	25	0.32	96	0.271	142	0.324
Mix 85	*BL1036	50	50	0	0	1	1	0	0	0.74	0.74	0	8	0.5	14	80139136	84648390	0.94673	22	0.455	22	0.364	143	0.294	187	0.321
Mix 85	*BM4107	50	50	0	0	1	1	0	0	0.68	0.68	0	9	0.555556	20	41206483	72042655	0.571973	20	0.55	21	0.381	127	0.417	168	0.429
Mix 85	*BM47	50	49	0	1	0.98	0.98	1	0	0.1	0.08	0.02	6	0.333333	23	7413810	52530062	0.141135	20	0.55	19	0.63	unknown	unknown	unknown	unknown
Mix 85	*ILSTS102	50	48	0	2	0.96	0.96	1	0	0.68	0.66	0.02	8	0.375	25	6527409	42904170	0.152139	20	0.5	19	0.579	110	0.545	149	0.544
Mix 85	BMS1315	50	48	0	2	0.96	0.96	1	0	0.56	0.48	0.08	7	0.571429	5	24787436	121191424	0.204531	22	0.409	20	0.5	96	0.354	138	0.384
Mix 85	BMS1857	50	45	0	5	0.9	0.9	1	4	0.6	0.58	0.02	14	0.357143	29	2768748	51505224	0.0537566	21	0.524	22	0.409	122	0.434	165	0.442
PRTG1	*BMS510	50	48	0	2	0.96	0.96	1	1	0.5	0.289474	0.210526	6	0.666667	28	22833114	46312546	0.493022	20	0.45	20	0.55	52	0.404	92	0.446
PRTG1	BM17132	50	25	12	13	0.657895	0.5	11	2	0.688889	0.644444	0.0444444	10	0.5	19	38491319	64057457	0.600887	22	0.455	22	0.409	41	0.39	85	0.412
PRTG1	BMS410	50	39	5	6	0.866667	0.78	2	0	0.72	0.7	0.02	11	0.363636	12	1755595	91163125	0.0192577	20	0.5	22	0.364	49	0.469	91	0.451
PRTG1	BMS527	50	17	31	2	0.894737	0.34	0	0	0.631579	0.631579	0	12	0.5	1	62074531	158337067	0.39204	22	0.409	24	0.375	134	0.41	180	0.406
PRTG1	RM372	50	46	0	4	0.92	0.92	1	0	0.64	0.6	0.04	12	0.333333	8	16080022	113384836	0.141818	20	0.45	21	0.476	87	0.379	128	0.406
PRTG2	*BM1225	50	50	0	0	1	1	0	0	0.72	0.72	0	13	0.384615	20	5934393	72042655	0.0823733	20	0.55	21	0.476	198	0.384	239	0.406
PRTG2	*BM1706	50	50	0	0	1	1	0	0	0.48	0.48	0	14	0.285714	16	69171913	81724687	0.846402	21	0.476	21	0.476	208	0.399	250	0.412
PRTG2	*BM1905	50	49	0	1	0.98	0.98	0	0	0.38	0.4	-0.02	10	0.3	23	45694214	52530062	0.869868	20	0.5	19	0.579	139	0.432	178	0.455
PRTG2	*BM2113	50	48	0	2	0.96	0.96	1	0	0.64	0.64	0	13	0.307692	2	127591854	137060424	0.930917	21	0.524	21	0.524	99	0.505	141	0.511
PRTG2	BM4440	50	44	0	6	0.88	0.88	4	0	0.58	0.52	0.06	11	0.454545	2	61057411	137060424	0.445478	20	0.5	21	0.524	92	0.402	133	0.436
PRTG2	BM720	50	39	3	8	0.829787	0.78	5	0	0.638298	0.531915	0.106383	13	0.461538	10	26289562	104305016	0.252045	24	0.542	25	0.48	104	0.452	153	0.471
PRTY A	*BM4513	50	49	1	0	1	0.98	0	0	0.163265	0.163265	0	2	1	14	65384963	84648390	0.77243	18	0.556	22	0.455	106	0.5	146	0.5
PRTY A	*BM7145	50	50	0	0	1	1	0	0	0.3	0.3	0	3	0.666667	1	79513042	158337067	0.502176	24	0.417	23	0.348	69	0.348	116	0.362
PRTY A	*SPS113	50	49	0	1	0.98	0.98	1	0	0.642857	0.595238	0.047619	3	0.666667	10	26289562	104305016	0.252045	24	0.542	25	0.48	104	0.452	153	0.471
PRTY A	BMS2270	50	40	8	2	0.952381	0.8	2	0	0.46	0.44	0.02	3	0.666667	24	20006337	62714930	0.319004	18	0.611	18	0.611	54	0.519	90	0.556
PRTY BC	*AGLA293	50	49	1	0	1	0.98	0	0	0	0	0	2	0.5	5	24060849	121191424	0.198536	25	0.44	25	0.4	182	0.478	232	0.466
PRTY BC	*BM4307	50	50	0	0	1	1	0	0	0	0	0	3	0.333333	1	32083635	158337067	0.202629	25	0.32	25	0.32	136	0.176	186	0.215
PRTY BC	*CSSM42	50	50	0	0	1	1	0	0	0.58	0.58	0	3	1	2	31589224	137060424	0.230477	24	0.5	24	0.458	167	0.341	215	0.372
All markers adapted from Schnabel, 2001 and Halbert, 2003.

## Sheet: Raw Data
Panel	Microsat	Fecal Samples	Allele 1	Allele 2	FTA Samples	Allele 1	Allele 2
Mix 80	BM1862	4267	205	207	4213	205	207
Mix 80	BM1862	4268	207	211	4214	207	211
Mix 80	BM1862	4269	211	211	4215	211	211
Mix 80	BM1862	4270	202	211	4216	202	211
Mix 80	BM1862	4271	205	207	4217	205	207
Mix 80	BM1862	4272	205	207	4218	205	207
Mix 80	BM1862	4273	205	207	4219	205	207
Mix 80	BM1862	4274	205	207	4220	205	207
Mix 80	BM1862	4275	207	207	4221	207	207
Mix 80	BM1862	4276	207	211	4222	207	211
Mix 80	BM1862	4277	207	211	4223	207	211
Mix 80	BM1862	4278	205	205	4224	205	205
Mix 80	BM1862	4279	205	207	4225	205	207
Mix 80	BM1862	4280	207	211	4226	207	211
Mix 80	BM1862	4281	202	205	4227	202	205
Mix 80	BM1862	4282	207	211	4228	207	211
Mix 80	BM1862	4283	205	205	4229	205	205
Mix 80	BM1862	4284	207	211	4230	207	211
Mix 80	BM1862	4285	205	207	4231	205	207
Mix 80	BM1862	4286	rerun		4232	207	207
Mix 80	BM1862	4287	rerun		4233	202	207
Mix 80	BM1862	4288	211	211	4234	211	211
Mix 80	BM1862	4289	205	207	4235	205	211
Mix 80	BM1862	4290	rerun		4236	205	211
Mix 80	BM1862	4291	rerun		4237	202	211
Mix 80	BM1862	4292	rerun		4238	205	211
Mix 80	BM1862	4293	rerun		4240	205	211
Mix 80	BM1862	4294	rerun		4241	205	205
Mix 80	BM1862	4295	rerun		4242	205	207
Mix 80	BM1862	4296	rerun		4243	205	205
Mix 80	BM1862	4297	rerun		4244	205	211
Mix 80	BM1862	4298	rerun		4245	205	211
Mix 80	BM1862	4299	rerun		4246	202	207
Mix 80	BM1862	4300	rerun		4247	202	205
Mix 80	BM1862	4301	rerun		4248	207	211
Mix 80	BM1862	4302	rerun		4249	205	211
Mix 80	BM1862	4303	rerun		4250	211	211
Mix 80	BM1862	4304	rerun		4251	205	207
Mix 80	BM1862	4305	rerun		4252	201	211
Mix 80	BM1862	4306	rerun		4253	205	211
Mix 80	BM1862	4309	rerun		4255	211	211
Mix 80	BM1862	4310	rerun		4256	205	205
Mix 80	BM1862	4311	rerun		4257	202	205
Mix 80	BM1862	4312	rerun		4259	205	207
Mix 80	BM1862	4313	rerun		4260	207	211
Mix 80	BM1862	4314	rerun		4261	205	207
Mix 80	BM1862	4315	rerun		4262	207	211
Mix 80	BM1862	4316	rerun		4263	205	205
Mix 80	BM1862	4317	rerun		4264	207	211
Mix 80	BM1862	4318	rerun		4265	205	211
Mix 80	BMS1001	4267	109	115	4213	109	115
Mix 80	BMS1001	4268	109	115	4214	109	115
Mix 80	BMS1001	4269	111	115	4215	111	115
Mix 80	BMS1001	4270	109	115	4216	109	115
Mix 80	BMS1001	4271	109	109	4217	109	109
Mix 80	BMS1001	4272	113	115	4218	113	115
Mix 80	BMS1001	4273	109	113	4219	109	113
Mix 80	BMS1001	4274	109	113	4220	109	113
Mix 80	BMS1001	4275	111	115	4221	111	115
Mix 80	BMS1001	4276	109	113	4222	109	113
Mix 80	BMS1001	4277	115	115	4223	115	115
Mix 80	BMS1001	4278	109	115	4224	109	115
Mix 80	BMS1001	4279	109	113	4225	109	113
Mix 80	BMS1001	4280	109	113	4226	109	113
Mix 80	BMS1001	4281	109	109	4227	109	109
Mix 80	BMS1001	4282	113	115	4228	113	115
Mix 80	BMS1001	4283	109	109	4229	109	109
Mix 80	BMS1001	4284	109	113	4230	109	113
Mix 80	BMS1001	4285	113	115	4231	113	115
Mix 80	BMS1001	4286	115	115	4232	115	115
Mix 80	BMS1001	4287	rerun		4233	109	115
Mix 80	BMS1001	4288	111	115	4234	111	115
Mix 80	BMS1001	4289	113	113	4235	109	113
Mix 80	BMS1001	4290	115	115	4236	115	115
Mix 80	BMS1001	4291	109	115	4237	109	115
Mix 80	BMS1001	4292	113	113	4238	113	113
Mix 80	BMS1001	4293	109	115	4240	109	115
Mix 80	BMS1001	4294	113	115	4241	113	115
Mix 80	BMS1001	4295	109	113	4242	109	113
Mix 80	BMS1001	4296	113	115	4243	113	115
Mix 80	BMS1001	4297	109	115	4244	109	115
Mix 80	BMS1001	4298	109	115	4245	109	115
Mix 80	BMS1001	4299	113	113	4246	113	113
Mix 80	BMS1001	4300	rerun		4247	109	113
Mix 80	BMS1001	4301	113	115	4248	113	115
Mix 80	BMS1001	4302	109	113	4249	109	113
Mix 80	BMS1001	4303	113	115	4250	113	115
Mix 80	BMS1001	4304	109	113	4251	109	113
Mix 80	BMS1001	4305	109	113	4252	109	113
Mix 80	BMS1001	4306	109	109	4253	109	109
Mix 80	BMS1001	4309	115	115	4255	113	115
Mix 80	BMS1001	4310	115	115	4256	115	115
Mix 80	BMS1001	4311	115	115	4257	115	115
Mix 80	BMS1001	4312	109	113	4259	109	113
Mix 80	BMS1001	4313	109	113	4260	109	113
Mix 80	BMS1001	4314	113	115	4261	113	115
Mix 80	BMS1001	4315	115	115	4262	115	115
Mix 80	BMS1001	4316	rerun		4263	115	115
Mix 80	BMS1001	4317	rerun		4264	113	113
Mix 80	BMS1001	4318	109	115	4265	109	115
Mix 80	BMS1074	4267	156	158	4213	156	158
Mix 80	BMS1074	4268	160	160	4214	160	160
Mix 80	BMS1074	4269	154	160	4215	154	160
Mix 80	BMS1074	4270	156	160	4216	156	160
Mix 80	BMS1074	4271	160	160	4217	160	160
Mix 80	BMS1074	4272	160	160	4218	160	160
Mix 80	BMS1074	4273	154	160	4219	154	160
Mix 80	BMS1074	4274	154	156	4220	154	156
Mix 80	BMS1074	4275	154	156	4221	154	156
Mix 80	BMS1074	4276	156	160	4222	156	160
Mix 80	BMS1074	4277	158	160	4223	158	160
Mix 80	BMS1074	4278	160	160	4224	160	160
Mix 80	BMS1074	4279	154	160	4225	154	160
Mix 80	BMS1074	4280	156	160	4226	156	160
Mix 80	BMS1074	4281	156	160	4227	156	160
Mix 80	BMS1074	4282	154	156	4228	154	156
Mix 80	BMS1074	4283	154	160	4229	154	160
Mix 80	BMS1074	4284	154	160	4230	154	160
Mix 80	BMS1074	4285	158	160	4231	158	160
Mix 80	BMS1074	4286	rerun		4232	156	156
Mix 80	BMS1074	4287	rerun		4233	156	160
Mix 80	BMS1074	4288	158	160	4234	158	160
Mix 80	BMS1074	4289	rerun		4235	154	160
Mix 80	BMS1074	4290	rerun		4236	158	160
Mix 80	BMS1074	4291	160	160	4237	160	160
Mix 80	BMS1074	4292	rerun		4238	154	158
Mix 80	BMS1074	4293	154	158	4240	154	158
Mix 80	BMS1074	4294	158	160	4241	158	160
Mix 80	BMS1074	4295	rerun		4242	156	158
Mix 80	BMS1074	4296	160	160	4243	160	160
Mix 80	BMS1074	4297	rerun		4244	158	160
Mix 80	BMS1074	4298	rerun		4245	156	160
Mix 80	BMS1074	4299	rerun		4246	160	160
Mix 80	BMS1074	4300	rerun		4247	154	160
Mix 80	BMS1074	4301	rerun		4248	160	160
Mix 80	BMS1074	4302	rerun		4249	160	160
Mix 80	BMS1074	4303	rerun		4250	156	160
Mix 80	BMS1074	4304	160	160	4251	160	160
Mix 80	BMS1074	4305	rerun		4252	158	160
Mix 80	BMS1074	4306	rerun		4253	160	160
Mix 80	BMS1074	4309	rerun		4255	160	160
Mix 80	BMS1074	4310	rerun		4256	154	160
Mix 80	BMS1074	4311	rerun		4257	156	156
Mix 80	BMS1074	4312	rerun		4259	158	160
Mix 80	BMS1074	4313	rerun		4260	156	160
Mix 80	BMS1074	4314	rerun		4261	156	160
Mix 80	BMS1074	4315	160	160	4262	160	160
Mix 80	BMS1074	4316	rerun		4263	158	160
Mix 80	BMS1074	4317	rerun		4264	158	158
Mix 80	BMS1074	4318	rerun		4265	160	160
Mix 80	BMS1675	4267	87	87	4213	87	87
Mix 80	BMS1675	4268	rerun		4214	87	91
Mix 80	BMS1675	4269	87	87	4215	87	87
Mix 80	BMS1675	4270	87	87	4216	87	87
Mix 80	BMS1675	4271	89	91	4217	89	91
Mix 80	BMS1675	4272	87	87	4218	87	87
Mix 80	BMS1675	4273	87	87	4219	87	87
Mix 80	BMS1675	4274	87	87	4220	87	87
Mix 80	BMS1675	4275	87	91	4221	87	91
Mix 80	BMS1675	4276	87	87	4222	87	87
Mix 80	BMS1675	4277	87	87	4223	87	87
Mix 80	BMS1675	4278	87	87	4224	87	87
Mix 80	BMS1675	4279	87	91	4225	87	91
Mix 80	BMS1675	4280	87	87	4226	87	87
Mix 80	BMS1675	4281	87	87	4227	87	87
Mix 80	BMS1675	4282	87	87	4228	87	87
Mix 80	BMS1675	4283	87	87	4229	87	87
Mix 80	BMS1675	4284	87	87	4230	87	87
Mix 80	BMS1675	4285	87	89	4231	87	89
Mix 80	BMS1675	4286	rerun		4232	87	89
Mix 80	BMS1675	4287	rerun		4233	87	91
Mix 80	BMS1675	4288	87	91	4234	87	91
Mix 80	BMS1675	4289	87	87	4235	87	87
Mix 80	BMS1675	4290	87	87	4236	87	87
Mix 80	BMS1675	4291	87	87	4237	87	87
Mix 80	BMS1675	4292	87	87	4238	87	87
Mix 80	BMS1675	4293	91	91	4240	91	91
Mix 80	BMS1675	4294	87	91	4241	87	91
Mix 80	BMS1675	4295	87	87	4242	87	87
Mix 80	BMS1675	4296	87	87	4243	87	87
Mix 80	BMS1675	4297	87	87	4244	87	87
Mix 80	BMS1675	4298	87	87	4245	87	87
Mix 80	BMS1675	4299	rerun		4246	87	87
Mix 80	BMS1675	4300	87	87	4247	87	87
Mix 80	BMS1675	4301	rerun		4248	87	87
Mix 80	BMS1675	4302	rerun		4249	87	91
Mix 80	BMS1675	4303	rerun		4250	87	91
Mix 80	BMS1675	4304	87	87	4251	87	87
Mix 80	BMS1675	4305	rerun		4252	87	91
Mix 80	BMS1675	4306	87	87	4253	87	87
Mix 80	BMS1675	4309	rerun		4255	87	87
Mix 80	BMS1675	4310	rerun		4256	87	89
Mix 80	BMS1675	4311	rerun		4257	87	87
Mix 80	BMS1675	4312	rerun		4259	87	87
Mix 80	BMS1675	4313	rerun		4260	87	91
Mix 80	BMS1675	4314	rerun		4261	87	91
Mix 80	BMS1675	4315	rerun		4262	87	87
Mix 80	BMS1675	4316	rerun		4263	87	87
Mix 80	BMS1675	4317	rerun		4264	87	87
Mix 80	BMS1675	4318	rerun		4265	87	87
Mix 80	BMS1716	4267	191	191	4213	191	191
Mix 80	BMS1716	4268	191	191	4214	191	191
Mix 80	BMS1716	4269	191	191	4215	191	191
Mix 80	BMS1716	4270	191	191	4216	191	191
Mix 80	BMS1716	4271	191	191	4217	191	191
Mix 80	BMS1716	4272	191	191	4218	191	191
Mix 80	BMS1716	4273	191	191	4219	191	191
Mix 80	BMS1716	4274	191	191	4220	191	191
Mix 80	BMS1716	4275	191	191	4221	191	191
Mix 80	BMS1716	4276	191	191	4222	191	191
Mix 80	BMS1716	4277	191	191	4223	191	191
Mix 80	BMS1716	4278	191	191	4224	191	191
Mix 80	BMS1716	4279	191	191	4225	191	191
Mix 80	BMS1716	4280	191	191	4226	191	191
Mix 80	BMS1716	4281	191	191	4227	191	191
Mix 80	BMS1716	4282	191	191	4228	191	191
Mix 80	BMS1716	4283	191	191	4229	191	191
Mix 80	BMS1716	4284	191	191	4230	191	191
Mix 80	BMS1716	4285	191	191	4231	191	191
Mix 80	BMS1716	4286	191	191	4232	191	191
Mix 80	BMS1716	4287	rerun		4233	189	191
Mix 80	BMS1716	4288	191	191	4234	191	191
Mix 80	BMS1716	4289	191	191	4235	191	191
Mix 80	BMS1716	4290	rerun		4236	191	191
Mix 80	BMS1716	4291	191	191	4237	191	191
Mix 80	BMS1716	4292	191	191	4238	191	191
Mix 80	BMS1716	4293	189	191	4240	189	191
Mix 80	BMS1716	4294	rerun		4241	189	195
Mix 80	BMS1716	4295	rerun		4242	189	191
Mix 80	BMS1716	4296	191	191	4243	191	191
Mix 80	BMS1716	4297	rerun		4244	191	191
Mix 80	BMS1716	4298	rerun		4245	191	191
Mix 80	BMS1716	4299	rerun		4246	189	191
Mix 80	BMS1716	4300	191	191	4247	191	191
Mix 80	BMS1716	4301	191	191	4248	191	191
Mix 80	BMS1716	4302	rerun		4249	191	191
Mix 80	BMS1716	4303	191	191	4250	191	191
Mix 80	BMS1716	4304	191	191	4251	191	191
Mix 80	BMS1716	4305	rerun		4252	189	191
Mix 80	BMS1716	4306	rerun		4253	191	191
Mix 80	BMS1716	4309	rerun		4255	189	191
Mix 80	BMS1716	4310	rerun		4256	189	191
Mix 80	BMS1716	4311	rerun		4257	191	191
Mix 80	BMS1716	4312	rerun		4259	191	191
Mix 80	BMS1716	4313	rerun		4260	191	195
Mix 80	BMS1716	4314	rerun		4261	191	191
Mix 80	BMS1716	4315	191	191	4262	191	191
Mix 80	BMS1716	4316	191	191	4263	191	191
Mix 80	BMS1716	4317	rerun		4264	189	195
Mix 80	BMS1716	4318	rerun		4265	191	191
Mix 80	HUJ246	4267	262	262	4213	262	262
Mix 80	HUJ246	4268	rerun		4214	258	262
Mix 80	HUJ246	4269	262	262	4215	262	262
Mix 80	HUJ246	4270	262	262	4216	262	262
Mix 80	HUJ246	4271	258	262	4217	258	262
Mix 80	HUJ246	4272	262	262	4218	262	262
Mix 80	HUJ246	4273	262	262	4219	262	262
Mix 80	HUJ246	4274	258	262	4220	258	262
Mix 80	HUJ246	4275	262	262	4221	262	262
Mix 80	HUJ246	4276	262	262	4222	262	262
Mix 80	HUJ246	4277	258	262	4223	258	262
Mix 80	HUJ246	4278	258	262	4224	258	262
Mix 80	HUJ246	4279	258	260	4225	258	260
Mix 80	HUJ246	4280	262	262	4226	262	262
Mix 80	HUJ246	4281	258	262	4227	258	262
Mix 80	HUJ246	4282	262	262	4228	262	262
Mix 80	HUJ246	4283	262	262	4229	262	262
Mix 80	HUJ246	4284	258	264	4230	258	264
Mix 80	HUJ246	4285	rerun		4231	258	258
Mix 80	HUJ246	4286	rerun		4232	258	262
Mix 80	HUJ246	4287	rerun		4233	258	258
Mix 80	HUJ246	4288	258	262	4234	258	262
Mix 80	HUJ246	4289	rerun		4235	258	262
Mix 80	HUJ246	4290	rerun		4236	262	262
Mix 80	HUJ246	4291	rerun		4237	262	262
Mix 80	HUJ246	4292	rerun		4238	262	264
Mix 80	HUJ246	4293	rerun		4240	262	262
Mix 80	HUJ246	4294	rerun		4241	258	258
Mix 80	HUJ246	4295	rerun		4242	258	258
Mix 80	HUJ246	4296	rerun		4243	260	262
Mix 80	HUJ246	4297	rerun		4244	258	262
Mix 80	HUJ246	4298	rerun		4245	258	262
Mix 80	HUJ246	4299	rerun		4246	262	262
Mix 80	HUJ246	4300	rerun		4247	262	262
Mix 80	HUJ246	4301	rerun		4248	258	260
Mix 80	HUJ246	4302	rerun		4249	262	264
Mix 80	HUJ246	4303	rerun		4250	262	262
Mix 80	HUJ246	4304	rerun		4251	258	262
Mix 80	HUJ246	4305	rerun		4252	258	262
Mix 80	HUJ246	4306	rerun		4253	258	262
Mix 80	HUJ246	4309	rerun		4255	258	258
Mix 80	HUJ246	4310	rerun		4256	260	262
Mix 80	HUJ246	4311	rerun		4257	262	262
Mix 80	HUJ246	4312	rerun		4259	260	262
Mix 80	HUJ246	4313	rerun		4260	258	262
Mix 80	HUJ246	4314	rerun		4261	260	262
Mix 80	HUJ246	4315	rerun		4262	262	262
Mix 80	HUJ246	4316	rerun		4263	262	262
Mix 80	HUJ246	4317	rerun		4264	258	264
Mix 80	HUJ246	4318	rerun		4265	260	262
Mix 82	BM4311	4267	104	104	4213	104	104
Mix 82	BM4311	4268	98	98	4214	98	104
Mix 82	BM4311	4269	90	98	4215	90	98
Mix 82	BM4311	4270	92	92	4216	92	98
Mix 82	BM4311	4271	98	104	4217	98	104
Mix 82	BM4311	4272	102	104	4218	102	104
Mix 82	BM4311	4273	92	104	4219	92	104
Mix 82	BM4311	4274	96	98	4220	96	98
Mix 82	BM4311	4275	90	104	4221	90	104
Mix 82	BM4311	4276	90	96	4222	90	96
Mix 82	BM4311	4277	98	98	4223	98	98
Mix 82	BM4311	4278	98	104	4224	98	104
Mix 82	BM4311	4279	98	98	4225	98	98
Mix 82	BM4311	4280	98	102	4226	98	102
Mix 82	BM4311	4281	98	104	4227	98	104
Mix 82	BM4311	4282	104	104	4228	104	104
Mix 82	BM4311	4283	98	98	4229	98	98
Mix 82	BM4311	4284	102	104	4230	102	104
Mix 82	BM4311	4285	98	104	4231	98	104
Mix 82	BM4311	4286	96	104	4232	96	104
Mix 82	BM4311	4287	98	98	4233	98	98
Mix 82	BM4311	4288	98	104	4234	98	104
Mix 82	BM4311	4289	96	98	4235	96	98
Mix 82	BM4311	4290	104	104	4236	98	104
Mix 82	BM4311	4291	98	98	4237	98	98
Mix 82	BM4311	4292	102	104	4238	102	104
Mix 82	BM4311	4293	96	98	4240	96	98
Mix 82	BM4311	4294	90	104	4241	90	104
Mix 82	BM4311	4295	98	104	4242	98	104
Mix 82	BM4311	4296	98	102	4243	98	102
Mix 82	BM4311	4297	90	98	4244	90	98
Mix 82	BM4311	4298	92	104	4245	92	104
Mix 82	BM4311	4299	90	98	4246	90	98
Mix 82	BM4311	4300	104	104	4247	104	104
Mix 82	BM4311	4301	96	104	4248	96	104
Mix 82	BM4311	4302	90	98	4249	90	98
Mix 82	BM4311	4303	102	104	4250	102	104
Mix 82	BM4311	4304	98	102	4251	98	102
Mix 82	BM4311	4305	96	104	4252	96	104
Mix 82	BM4311	4306	102	104	4253	102	104
Mix 82	BM4311	4309	96	104	4255	96	104
Mix 82	BM4311	4310	90	104	4256	90	104
Mix 82	BM4311	4311	98	98	4257	98	98
Mix 82	BM4311	4312	rerun		4259	98	98
Mix 82	BM4311	4313	92	98	4260	92	98
Mix 82	BM4311	4314	98	98	4261	98	98
Mix 82	BM4311	4315	102	104	4262	102	104
Mix 82	BM4311	4316	rerun		4263	98	104
Mix 82	BM4311	4317	98	104	4264	98	104
Mix 82	BM4311	4318	96	98	4265	96	98
Mix 82	BM711	4267	161	167	4213	161	167
Mix 82	BM711	4268	167	175	4214	167	175
Mix 82	BM711	4269	161	161	4215	161	161
Mix 82	BM711	4270	161	161	4216	161	161
Mix 82	BM711	4271	161	161	4217	161	161
Mix 82	BM711	4272	161	161	4218	161	161
Mix 82	BM711	4273	161	175	4219	161	175
Mix 82	BM711	4274	161	161	4220	161	161
Mix 82	BM711	4275	161	161	4221	161	161
Mix 82	BM711	4276	161	161	4222	161	161
Mix 82	BM711	4277	161	175	4223	161	175
Mix 82	BM711	4278	161	161	4224	161	161
Mix 82	BM711	4279	161	161	4225	161	161
Mix 82	BM711	4280	161	161	4226	161	161
Mix 82	BM711	4281	161	167	4227	161	167
Mix 82	BM711	4282	161	161	4228	161	161
Mix 82	BM711	4283	161	161	4229	161	161
Mix 82	BM711	4284	161	161	4230	161	161
Mix 82	BM711	4285	165	175	4231	165	175
Mix 82	BM711	4286	161	175	4232	161	175
Mix 82	BM711	4287	161	161	4233	161	161
Mix 82	BM711	4288	161	161	4234	161	161
Mix 82	BM711	4289	165	167	4235	165	167
Mix 82	BM711	4290	161	165	4236	161	165
Mix 82	BM711	4291	161	161	4237	161	161
Mix 82	BM711	4292	161	167	4238	161	167
Mix 82	BM711	4293	161	161	4240	161	161
Mix 82	BM711	4294	161	165	4241	161	165
Mix 82	BM711	4295	161	165	4242	161	165
Mix 82	BM711	4296	161	167	4243	161	167
Mix 82	BM711	4297	161	161	4244	161	161
Mix 82	BM711	4298	161	165	4245	161	165
Mix 82	BM711	4299	rerun		4246	161	167
Mix 82	BM711	4300	rerun		4247	161	167
Mix 82	BM711	4301	161	161	4248	161	161
Mix 82	BM711	4302	rerun		4249	161	175
Mix 82	BM711	4303	161	161	4250	161	161
Mix 82	BM711	4304	161	161	4251	161	161
Mix 82	BM711	4305	rerun		4252	161	167
Mix 82	BM711	4306	161	161	4253	161	161
Mix 82	BM711	4309	rerun		4255	161	161
Mix 82	BM711	4310	rerun		4256	161	167
Mix 82	BM711	4311	rerun		4257	161	161
Mix 82	BM711	4312	rerun		4259	165	175
Mix 82	BM711	4313	rerun		4260	161	161
Mix 82	BM711	4314	rerun		4261	167	167
Mix 82	BM711	4315	rerun		4262	161	165
Mix 82	BM711	4316	rerun		4263	167	175
Mix 82	BM711	4317	rerun		4264	161	167
Mix 82	BM711	4318	rerun		4265	161	167
Mix 82	BM6017	4267	116	118	4213	116	118
Mix 82	BM6017	4268	118	118	4214	118	118
Mix 82	BM6017	4269	118	118	4215	118	118
Mix 82	BM6017	4270	118	118	4216	118	118
Mix 82	BM6017	4271	118	122	4217	118	122
Mix 82	BM6017	4272	116	120	4218	116	120
Mix 82	BM6017	4273	116	118	4219	116	118
Mix 82	BM6017	4274	104	118	4220	104	118
Mix 82	BM6017	4275	116	120	4221	116	120
Mix 82	BM6017	4276	118	118	4222	118	118
Mix 82	BM6017	4277	118	118	4223	118	118
Mix 82	BM6017	4278	104	120	4224	104	120
Mix 82	BM6017	4279	118	118	4225	118	118
Mix 82	BM6017	4280	118	118	4226	118	118
Mix 82	BM6017	4281	104	120	4227	104	120
Mix 82	BM6017	4282	104	116	4228	104	116
Mix 82	BM6017	4283	116	118	4229	116	118
Mix 82	BM6017	4284	118	118	4230	118	118
Mix 82	BM6017	4285	116	118	4231	116	118
Mix 82	BM6017	4286	118	118	4232	118	118
Mix 82	BM6017	4287	118	120	4233	118	120
Mix 82	BM6017	4288	116	120	4234	116	120
Mix 82	BM6017	4289	118	118	4235	118	118
Mix 82	BM6017	4290	118	118	4236	118	118
Mix 82	BM6017	4291	118	118	4237	118	118
Mix 82	BM6017	4292	116	118	4238	116	118
Mix 82	BM6017	4293	120	120	4240	120	120
Mix 82	BM6017	4294	120	120	4241	120	120
Mix 82	BM6017	4295	104	118	4242	104	118
Mix 82	BM6017	4296	118	118	4243	118	118
Mix 82	BM6017	4297	rerun		4244	118	118
Mix 82	BM6017	4298	118	118	4245	118	118
Mix 82	BM6017	4299	118	118	4246	118	118
Mix 82	BM6017	4300	rerun		4247	116	120
Mix 82	BM6017	4301	118	118	4248	118	118
Mix 82	BM6017	4302	104	116	4249	104	116
Mix 82	BM6017	4303	116	118	4250	116	118
Mix 82	BM6017	4304	116	116	4251	116	116
Mix 82	BM6017	4305	118	118	4252	118	118
Mix 82	BM6017	4306	118	118	4253	118	118
Mix 82	BM6017	4309	rerun		4255	116	118
Mix 82	BM6017	4310	rerun		4256	104	118
Mix 82	BM6017	4311	rerun		4257	118	118
Mix 82	BM6017	4312	rerun		4259	116	118
Mix 82	BM6017	4313	118	118	4260	118	118
Mix 82	BM6017	4314	118	118	4261	118	118
Mix 82	BM6017	4315	rerun		4262	116	118
Mix 82	BM6017	4316	rerun		4263	104	118
Mix 82	BM6017	4317	118	118	4264	118	118
Mix 82	BM6017	4318	rerun		4265	118	122
Mix 82	INRA189	4267	0	0	4213	0	0
Mix 82	INRA189	4268	0	0	4214	0	0
Mix 82	INRA189	4269	0	0	4215	0	0
Mix 82	INRA189	4270	0	0	4216	0	0
Mix 82	INRA189	4271	0	0	4217	0	0
Mix 82	INRA189	4272	0	0	4218	0	0
Mix 82	INRA189	4273	0	0	4219	0	0
Mix 82	INRA189	4274	0	0	4220	0	0
Mix 82	INRA189	4275	0	0	4221	0	0
Mix 82	INRA189	4276	0	0	4222	0	0
Mix 82	INRA189	4277	96	0	4223	96	0
Mix 82	INRA189	4278	0	0	4224	98	0
Mix 82	INRA189	4279	96	0	4225	0	0
Mix 82	INRA189	4280	0	0	4226	0	0
Mix 82	INRA189	4281	0	0	4227	98	0
Mix 82	INRA189	4282	96	0	4228	96	0
Mix 82	INRA189	4283	0	0	4229	0	0
Mix 82	INRA189	4284	0	0	4230	0	0
Mix 82	INRA189	4285	0	0	4231	0	0
Mix 82	INRA189	4286	0	0	4232	0	0
Mix 82	INRA189	4287	0	0	4233	0	0
Mix 82	INRA189	4288	0	0	4234	0	0
Mix 82	INRA189	4289	0	0	4235	0	0
Mix 82	INRA189	4290	0	0	4236	0	0
Mix 82	INRA189	4291	0	0	4237	0	0
Mix 82	INRA189	4292	0	0	4238	0	0
Mix 82	INRA189	4293	96	0	4240	96	0
Mix 82	INRA189	4294	96	0	4241	96	0
Mix 82	INRA189	4295	96	0	4242	96	0
Mix 82	INRA189	4296	96	0	4243	96	0
Mix 82	INRA189	4297	96	0	4244	96	0
Mix 82	INRA189	4298	96	0	4245	96	0
Mix 82	INRA189	4299	0	0	4246	0	0
Mix 82	INRA189	4300	0	0	4247	0	0
Mix 82	INRA189	4301	0	0	4248	0	0
Mix 82	INRA189	4302	0	0	4249	0	0
Mix 82	INRA189	4303	0	0	4250	0	0
Mix 82	INRA189	4304	0	0	4251	0	0
Mix 82	INRA189	4305	0	0	4252	0	0
Mix 82	INRA189	4306	0	0	4253	0	0
Mix 82	INRA189	4309	0	0	4255	0	0
Mix 82	INRA189	4310	0	0	4256	0	0
Mix 82	INRA189	4311	0	0	4257	0	0
Mix 82	INRA189	4312	0	0	4259	0	0
Mix 82	INRA189	4313	0	0	4260	0	0
Mix 82	INRA189	4314	0	0	4261	0	0
Mix 82	INRA189	4315	0	0	4262	0	0
Mix 82	INRA189	4316	0	0	4263	0	0
Mix 82	INRA189	4317	0	0	4264	0	0
Mix 82	INRA189	4318	0	0	4265	0	0
Mix 82	TGLA122	4267	136	148	4213	136	148
Mix 82	TGLA122	4268	rerun		4214	142	148
Mix 82	TGLA122	4269	140	140	4215	140	150
Mix 82	TGLA122	4270	rerun		4216	140	148
Mix 82	TGLA122	4271	148	150	4217	148	150
Mix 82	TGLA122	4272	140	150	4218	140	150
Mix 82	TGLA122	4273	136	148	4219	136	148
Mix 82	TGLA122	4274	136	142	4220	136	142
Mix 82	TGLA122	4275	rerun		4221	148	150
Mix 82	TGLA122	4276	142	148	4222	142	148
Mix 82	TGLA122	4277	140	142	4223	140	142
Mix 82	TGLA122	4278	148	148	4224	148	148
Mix 82	TGLA122	4279	140	148	4225	140	148
Mix 82	TGLA122	4280	148	150	4226	148	150
Mix 82	TGLA122	4281	136	142	4227	136	142
Mix 82	TGLA122	4282	140	140	4228	140	140
Mix 82	TGLA122	4283	142	148	4229	142	148
Mix 82	TGLA122	4284	148	150	4230	148	150
Mix 82	TGLA122	4285	142	142	4231	142	142
Mix 82	TGLA122	4286	rerun		4232	148	150
Mix 82	TGLA122	4287	rerun		4233	136	150
Mix 82	TGLA122	4288	rerun		4234	140	148
Mix 82	TGLA122	4289	150	150	4235	140	150
Mix 82	TGLA122	4290	rerun		4236	142	148
Mix 82	TGLA122	4291	148	150	4237	148	150
Mix 82	TGLA122	4292	rerun		4238	148	148
Mix 82	TGLA122	4293	140	140	4240	140	140
Mix 82	TGLA122	4294	148	148	4241	148	148
Mix 82	TGLA122	4295	150	150	4242	150	150
Mix 82	TGLA122	4296	148	150	4243	148	150
Mix 82	TGLA122	4297	140	148	4244	140	148
Mix 82	TGLA122	4298	148	148	4245	148	148
Mix 82	TGLA122	4299	rerun		4246	140	142
Mix 82	TGLA122	4300	rerun		4247	142	148
Mix 82	TGLA122	4301	140	140	4248	140	140
Mix 82	TGLA122	4302	rerun		4249	142	148
Mix 82	TGLA122	4303	142	142	4250	142	142
Mix 82	TGLA122	4304	142	150	4251	142	150
Mix 82	TGLA122	4305	rerun		4252	140	150
Mix 82	TGLA122	4306	140	148	4253	140	148
Mix 82	TGLA122	4309	rerun		4255	148	148
Mix 82	TGLA122	4310	rerun		4256	148	148
Mix 82	TGLA122	4311	rerun		4257	140	148
Mix 82	TGLA122	4312	rerun		4259	140	148
Mix 82	TGLA122	4313	rerun		4260	148	150
Mix 82	TGLA122	4314	rerun		4261	148	150
Mix 82	TGLA122	4315	rerun		4262	150	150
Mix 82	TGLA122	4316	rerun		4263	148	148
Mix 82	TGLA122	4317	rerun		4264	136	150
Mix 82	TGLA122	4318	rerun		4265	148	148
Mix 85	BL1036	4267	177	191	4213	177	191
Mix 85	BL1036	4268	181	191	4214	181	191
Mix 85	BL1036	4269	181	191	4215	181	191
Mix 85	BL1036	4270	177	181	4216	177	181
Mix 85	BL1036	4271	177	191	4217	177	191
Mix 85	BL1036	4272	181	191	4218	181	191
Mix 85	BL1036	4273	177	191	4219	177	191
Mix 85	BL1036	4274	177	191	4220	177	191
Mix 85	BL1036	4275	181	191	4221	181	191
Mix 85	BL1036	4276	181	191	4222	181	191
Mix 85	BL1036	4277	177	191	4223	177	191
Mix 85	BL1036	4278	181	191	4224	181	191
Mix 85	BL1036	4279	191	191	4225	191	191
Mix 85	BL1036	4280	191	191	4226	191	191
Mix 85	BL1036	4281	191	191	4227	191	191
Mix 85	BL1036	4282	177	191	4228	177	191
Mix 85	BL1036	4283	177	191	4229	177	191
Mix 85	BL1036	4284	177	191	4230	177	191
Mix 85	BL1036	4285	181	191	4231	181	191
Mix 85	BL1036	4286	181	181	4232	181	181
Mix 85	BL1036	4287	191	191	4233	191	191
Mix 85	BL1036	4288	177	191	4234	177	191
Mix 85	BL1036	4289	177	191	4235	177	191
Mix 85	BL1036	4290	177	191	4236	177	191
Mix 85	BL1036	4291	181	191	4237	181	191
Mix 85	BL1036	4292	181	191	4238	181	191
Mix 85	BL1036	4293	191	191	4240	191	191
Mix 85	BL1036	4294	177	191	4241	177	191
Mix 85	BL1036	4295	177	181	4242	177	181
Mix 85	BL1036	4296	177	181	4243	177	181
Mix 85	BL1036	4297	181	191	4244	181	191
Mix 85	BL1036	4298	191	191	4245	191	191
Mix 85	BL1036	4299	177	177	4246	177	177
Mix 85	BL1036	4300	181	191	4247	181	191
Mix 85	BL1036	4301	181	191	4248	181	191
Mix 85	BL1036	4302	177	191	4249	177	191
Mix 85	BL1036	4303	191	191	4250	191	191
Mix 85	BL1036	4304	181	191	4251	181	191
Mix 85	BL1036	4305	177	191	4252	177	191
Mix 85	BL1036	4306	177	181	4253	177	181
Mix 85	BL1036	4309	177	177	4255	177	177
Mix 85	BL1036	4310	177	191	4256	177	191
Mix 85	BL1036	4311	177	179	4257	177	179
Mix 85	BL1036	4312	181	191	4259	181	191
Mix 85	BL1036	4313	181	191	4260	181	191
Mix 85	BL1036	4314	177	191	4261	177	191
Mix 85	BL1036	4315	181	181	4262	181	181
Mix 85	BL1036	4316	191	191	4263	191	191
Mix 85	BL1036	4317	181	191	4264	181	191
Mix 85	BL1036	4318	191	191	4265	191	191
Mix 85	BM4107	4267	181	183	4213	181	183
Mix 85	BM4107	4268	165	165	4214	165	165
Mix 85	BM4107	4269	165	165	4215	165	165
Mix 85	BM4107	4270	165	183	4216	165	183
Mix 85	BM4107	4271	165	165	4217	165	165
Mix 85	BM4107	4272	165	183	4218	165	183
Mix 85	BM4107	4273	165	179	4219	165	179
Mix 85	BM4107	4274	165	165	4220	165	165
Mix 85	BM4107	4275	165	179	4221	165	179
Mix 85	BM4107	4276	165	183	4222	165	183
Mix 85	BM4107	4277	165	165	4223	165	165
Mix 85	BM4107	4278	165	181	4224	165	181
Mix 85	BM4107	4279	183	183	4225	183	183
Mix 85	BM4107	4280	165	179	4226	165	179
Mix 85	BM4107	4281	165	181	4227	165	181
Mix 85	BM4107	4282	165	181	4228	165	181
Mix 85	BM4107	4283	165	183	4229	165	183
Mix 85	BM4107	4284	179	179	4230	179	179
Mix 85	BM4107	4285	179	185	4231	179	185
Mix 85	BM4107	4286	165	183	4232	165	183
Mix 85	BM4107	4287	165	181	4233	165	181
Mix 85	BM4107	4288	165	179	4234	165	179
Mix 85	BM4107	4289	179	179	4235	179	179
Mix 85	BM4107	4290	165	179	4236	165	179
Mix 85	BM4107	4291	165	183	4237	165	183
Mix 85	BM4107	4292	165	165	4238	165	165
Mix 85	BM4107	4293	165	165	4240	165	165
Mix 85	BM4107	4294	165	183	4241	165	183
Mix 85	BM4107	4295	165	179	4242	165	179
Mix 85	BM4107	4296	165	183	4243	165	183
Mix 85	BM4107	4297	165	179	4244	165	179
Mix 85	BM4107	4298	165	183	4245	165	183
Mix 85	BM4107	4299	165	185	4246	165	185
Mix 85	BM4107	4300	183	183	4247	183	183
Mix 85	BM4107	4301	165	165	4248	165	165
Mix 85	BM4107	4302	165	181	4249	165	181
Mix 85	BM4107	4303	165	179	4250	165	179
Mix 85	BM4107	4304	165	183	4251	165	183
Mix 85	BM4107	4305	165	179	4252	165	179
Mix 85	BM4107	4306	165	181	4253	165	181
Mix 85	BM4107	4309	165	183	4255	165	183
Mix 85	BM4107	4310	165	165	4256	165	165
Mix 85	BM4107	4311	165	181	4257	165	181
Mix 85	BM4107	4312	165	183	4259	165	183
Mix 85	BM4107	4313	165	165	4260	165	165
Mix 85	BM4107	4314	165	183	4261	165	183
Mix 85	BM4107	4315	165	165	4262	165	165
Mix 85	BM4107	4316	165	183	4263	165	183
Mix 85	BM4107	4317	165	183	4264	165	183
Mix 85	BM4107	4318	165	165	4265	165	165
Mix 85	BM47	4267	103	103	4213	103	103
Mix 85	BM47	4268	103	103	4214	103	105
Mix 85	BM47	4269	103	103	4215	103	103
Mix 85	BM47	4270	103	103	4216	103	103
Mix 85	BM47	4271	103	103	4217	103	103
Mix 85	BM47	4272	103	103	4218	103	103
Mix 85	BM47	4273	103	103	4219	103	103
Mix 85	BM47	4274	103	103	4220	103	103
Mix 85	BM47	4275	103	103	4221	103	103
Mix 85	BM47	4276	103	103	4222	103	103
Mix 85	BM47	4277	103	103	4223	103	103
Mix 85	BM47	4278	103	103	4224	103	103
Mix 85	BM47	4279	103	103	4225	103	103
Mix 85	BM47	4280	103	103	4226	103	103
Mix 85	BM47	4281	103	103	4227	103	103
Mix 85	BM47	4282	103	103	4228	103	103
Mix 85	BM47	4283	103	103	4229	103	103
Mix 85	BM47	4284	103	103	4230	103	103
Mix 85	BM47	4285	103	103	4231	103	103
Mix 85	BM47	4286	103	103	4232	103	103
Mix 85	BM47	4287	103	103	4233	103	103
Mix 85	BM47	4288	103	103	4234	103	103
Mix 85	BM47	4289	103	103	4235	103	103
Mix 85	BM47	4290	103	103	4236	103	103
Mix 85	BM47	4291	103	103	4237	103	103
Mix 85	BM47	4292	103	103	4238	103	103
Mix 85	BM47	4293	103	103	4240	103	103
Mix 85	BM47	4294	103	103	4241	103	103
Mix 85	BM47	4295	103	105	4242	103	105
Mix 85	BM47	4296	103	103	4243	103	103
Mix 85	BM47	4297	103	103	4244	103	103
Mix 85	BM47	4298	103	103	4245	103	103
Mix 85	BM47	4299	103	103	4246	103	103
Mix 85	BM47	4300	103	103	4247	103	103
Mix 85	BM47	4301	103	103	4248	103	103
Mix 85	BM47	4302	103	103	4249	103	103
Mix 85	BM47	4303	103	103	4250	103	103
Mix 85	BM47	4304	103	103	4251	103	103
Mix 85	BM47	4305	103	105	4252	103	105
Mix 85	BM47	4306	103	103	4253	103	103
Mix 85	BM47	4309	103	103	4255	103	103
Mix 85	BM47	4310	103	103	4256	103	103
Mix 85	BM47	4311	103	103	4257	103	103
Mix 85	BM47	4312	103	103	4259	103	103
Mix 85	BM47	4313	103	103	4260	103	103
Mix 85	BM47	4314	103	105	4261	103	105
Mix 85	BM47	4315	103	105	4262	103	105
Mix 85	BM47	4316	103	103	4263	103	103
Mix 85	BM47	4317	103	103	4264	103	103
Mix 85	BM47	4318	103	103	4265	103	103
Mix 85	BMS1315	4267	135	141	4213	135	141
Mix 85	BMS1315	4268	135	141	4214	135	141
Mix 85	BMS1315	4269	137	145	4215	137	141
Mix 85	BMS1315	4270	135	135	4216	135	135
Mix 85	BMS1315	4271	135	141	4217	135	141
Mix 85	BMS1315	4272	135	141	4218	135	141
Mix 85	BMS1315	4273	135	135	4219	135	135
Mix 85	BMS1315	4274	135	137	4220	135	137
Mix 85	BMS1315	4275	135	135	4221	135	135
Mix 85	BMS1315	4276	135	135	4222	135	135
Mix 85	BMS1315	4277	135	135	4223	135	135
Mix 85	BMS1315	4278	135	141	4224	135	141
Mix 85	BMS1315	4279	135	141	4225	135	141
Mix 85	BMS1315	4280	135	141	4226	135	141
Mix 85	BMS1315	4281	137	141	4227	137	141
Mix 85	BMS1315	4282	135	137	4228	135	137
Mix 85	BMS1315	4283	135	135	4229	135	135
Mix 85	BMS1315	4284	135	141	4230	135	141
Mix 85	BMS1315	4285	135	135	4231	135	135
Mix 85	BMS1315	4286	135	137	4232	135	137
Mix 85	BMS1315	4287	135	137	4233	135	137
Mix 85	BMS1315	4288	135	137	4234	135	137
Mix 85	BMS1315	4289	135	135	4235	135	135
Mix 85	BMS1315	4290	141	147	4236	141	147
Mix 85	BMS1315	4291	135	137	4237	135	137
Mix 85	BMS1315	4292	137	137	4238	137	137
Mix 85	BMS1315	4293	135	141	4240	135	141
Mix 85	BMS1315	4294	135	141	4241	135	141
Mix 85	BMS1315	4295	141	141	4242	141	141
Mix 85	BMS1315	4296	135	135	4243	135	135
Mix 85	BMS1315	4297	135	137	4244	135	137
Mix 85	BMS1315	4298	135	141	4245	135	141
Mix 85	BMS1315	4299	135	135	4246	135	135
Mix 85	BMS1315	4300	141	141	4247	141	141
Mix 85	BMS1315	4301	135	135	4248	135	135
Mix 85	BMS1315	4302	147	147	4249	141	147
Mix 85	BMS1315	4303	135	141	4250	135	141
Mix 85	BMS1315	4304	135	141	4251	135	141
Mix 85	BMS1315	4305	137	147	4252	137	147
Mix 85	BMS1315	4306	135	141	4253	135	141
Mix 85	BMS1315	4309	135	141	4255	135	141
Mix 85	BMS1315	4310	135	137	4256	135	137
Mix 85	BMS1315	4311	135	137	4257	135	137
Mix 85	BMS1315	4312	137	141	4259	137	141
Mix 85	BMS1315	4313	135	135	4260	135	135
Mix 85	BMS1315	4314	135	141	4261	135	141
Mix 85	BMS1315	4315	141	147	4262	141	147
Mix 85	BMS1315	4316	135	141	4263	135	141
Mix 85	BMS1315	4317	135	135	4264	135	135
Mix 85	BMS1315	4318	137	147	4265	137	147
Mix 85	BMS1857	4267	150	170	4213	150	170
Mix 85	BMS1857	4268	158	158	4214	158	158
Mix 85	BMS1857	4269	150	170	4215	150	170
Mix 85	BMS1857	4270	142	142	4216	150	158
Mix 85	BMS1857	4271	150	156	4217	150	156
Mix 85	BMS1857	4272	158	170	4218	158	170
Mix 85	BMS1857	4273	142	158	4219	142	158
Mix 85	BMS1857	4274	156	158	4220	156	158
Mix 85	BMS1857	4275	158	158	4221	158	158
Mix 85	BMS1857	4276	156	158	4222	156	158
Mix 85	BMS1857	4277	156	170	4223	156	170
Mix 85	BMS1857	4278	158	158	4224	158	158
Mix 85	BMS1857	4279	158	170	4225	158	170
Mix 85	BMS1857	4280	158	158	4226	158	158
Mix 85	BMS1857	4281	158	158	4227	158	158
Mix 85	BMS1857	4282	142	158	4228	142	158
Mix 85	BMS1857	4283	158	158	4229	158	158
Mix 85	BMS1857	4284	150	158	4230	150	158
Mix 85	BMS1857	4285	156	158	4231	156	158
Mix 85	BMS1857	4286	146	146	4232	142	170
Mix 85	BMS1857	4287	146	146	4233	156	158
Mix 85	BMS1857	4288	142	158	4234	142	158
Mix 85	BMS1857	4289	142	142	4235	142	142
Mix 85	BMS1857	4290	158	158	4236	158	158
Mix 85	BMS1857	4291	158	158	4237	150	158
Mix 85	BMS1857	4292	158	158	4238	158	158
Mix 85	BMS1857	4293	158	158	4240	158	158
Mix 85	BMS1857	4294	142	158	4241	142	158
Mix 85	BMS1857	4295	142	158	4242	142	158
Mix 85	BMS1857	4296	142	156	4243	142	156
Mix 85	BMS1857	4297	146	146	4244	158	158
Mix 85	BMS1857	4298	150	170	4245	150	170
Mix 85	BMS1857	4299	156	158	4246	156	158
Mix 85	BMS1857	4300	150	150	4247	150	150
Mix 85	BMS1857	4301	142	142	4248	142	142
Mix 85	BMS1857	4302	158	158	4249	158	158
Mix 85	BMS1857	4303	156	156	4250	156	156
Mix 85	BMS1857	4304	158	158	4251	158	158
Mix 85	BMS1857	4305	142	150	4252	142	150
Mix 85	BMS1857	4306	156	158	4253	156	158
Mix 85	BMS1857	4309	158	158	4255	158	158
Mix 85	BMS1857	4310	156	158	4256	156	158
Mix 85	BMS1857	4311	142	170	4257	142	170
Mix 85	BMS1857	4312	158	158	4259	158	158
Mix 85	BMS1857	4313	150	158	4260	150	158
Mix 85	BMS1857	4314	150	150	4261	150	150
Mix 85	BMS1857	4315	150	158	4262	150	158
Mix 85	BMS1857	4316	158	158	4263	158	158
Mix 85	BMS1857	4317	158	158	4264	158	158
Mix 85	BMS1857	4318	158	158	4265	158	158
Mix 85	ILSTS102	4267	143	147	4213	143	147
Mix 85	ILSTS102	4268	143	147	4214	143	147
Mix 85	ILSTS102	4269	143	147	4215	143	147
Mix 85	ILSTS102	4270	143	145	4216	143	145
Mix 85	ILSTS102	4271	143	147	4217	143	147
Mix 85	ILSTS102	4272	143	143	4218	143	143
Mix 85	ILSTS102	4273	143	145	4219	143	145
Mix 85	ILSTS102	4274	143	143	4220	143	143
Mix 85	ILSTS102	4275	143	147	4221	143	147
Mix 85	ILSTS102	4276	143	147	4222	143	147
Mix 85	ILSTS102	4277	143	145	4223	143	145
Mix 85	ILSTS102	4278	143	145	4224	143	145
Mix 85	ILSTS102	4279	143	143	4225	143	143
Mix 85	ILSTS102	4280	143	145	4226	143	145
Mix 85	ILSTS102	4281	143	143	4227	143	143
Mix 85	ILSTS102	4282	143	143	4228	143	143
Mix 85	ILSTS102	4283	143	143	4229	143	143
Mix 85	ILSTS102	4284	143	147	4230	143	147
Mix 85	ILSTS102	4285	143	143	4231	143	143
Mix 85	ILSTS102	4286	145	145	4232	145	145
Mix 85	ILSTS102	4287	145	145	4233	145	145
Mix 85	ILSTS102	4288	145	147	4234	145	147
Mix 85	ILSTS102	4289	143	147	4235	145	147
Mix 85	ILSTS102	4290	145	145	4236	145	145
Mix 85	ILSTS102	4291	143	143	4237	143	145
Mix 85	ILSTS102	4292	143	147	4238	143	147
Mix 85	ILSTS102	4293	143	143	4240	143	143
Mix 85	ILSTS102	4294	143	143	4241	143	143
Mix 85	ILSTS102	4295	143	145	4242	143	145
Mix 85	ILSTS102	4296	147	147	4243	147	147
Mix 85	ILSTS102	4297	145	147	4244	145	147
Mix 85	ILSTS102	4298	143	143	4245	143	143
Mix 85	ILSTS102	4299	143	145	4246	143	145
Mix 85	ILSTS102	4300	143	145	4247	143	145
Mix 85	ILSTS102	4301	143	147	4248	143	147
Mix 85	ILSTS102	4302	143	143	4249	143	143
Mix 85	ILSTS102	4303	143	145	4250	143	145
Mix 85	ILSTS102	4304	143	147	4251	143	147
Mix 85	ILSTS102	4305	143	143	4252	143	143
Mix 85	ILSTS102	4306	147	147	4253	147	147
Mix 85	ILSTS102	4309	143	145	4255	143	145
Mix 85	ILSTS102	4310	143	143	4256	143	143
Mix 85	ILSTS102	4311	145	147	4257	145	147
Mix 85	ILSTS102	4312	145	147	4259	145	147
Mix 85	ILSTS102	4313	143	145	4260	143	145
Mix 85	ILSTS102	4314	145	147	4261	145	147
Mix 85	ILSTS102	4315	143	145	4262	143	145
Mix 85	ILSTS102	4316	143	143	4263	143	143
Mix 85	ILSTS102	4317	145	145	4264	145	145
Mix 85	ILSTS102	4318	143	145	4265	143	145
PRTG1	BM17132	4267	85	85	4213	85	85
PRTG1	BM17132	4268	89	89	4214	85	89
PRTG1	BM17132	4269	89	89	4215	89	89
PRTG1	BM17132	4270	89	89	4216	89	89
PRTG1	BM17132	4271	rerun		4217	85	95
PRTG1	BM17132	4272	rerun		4218	85	91
PRTG1	BM17132	4273	87	87	4219	87	87
PRTG1	BM17132	4274	rerun		4220	85	95
PRTG1	BM17132	4275	89	89	4221	89	89
PRTG1	BM17132	4276	85	95	4222	85	95
PRTG1	BM17132	4277	89	89	4223	89	89
PRTG1	BM17132	4278	85	89	4224	85	89
PRTG1	BM17132	4279	89	89	4225	89	89
PRTG1	BM17132	4280	85	85	4226	85	85
PRTG1	BM17132	4281	89	89	4227	89	89
PRTG1	BM17132	4282	89	89	4228	89	89
PRTG1	BM17132	4283	85	87	4229	85	87
PRTG1	BM17132	4284	89	89	4230	89	89
PRTG1	BM17132	4285	85	95	4231	85	95
PRTG1	BM17132	4286	85	85	4232	85	85
PRTG1	BM17132	4287	rerun		4233	87	89
PRTG1	BM17132	4288	89	89	4234	87	89
PRTG1	BM17132	4289	89	89	4235	85	89
PRTG1	BM17132	4290	85	85	4236	85	85
PRTG1	BM17132	4291	rerun		4237	87	87
PRTG1	BM17132	4292	rerun		4238	85	87
PRTG1	BM17132	4293	85	87	4240	85	87
PRTG1	BM17132	4294	85	85	4241	85	85
PRTG1	BM17132	4295	85	91	4242	85	91
PRTG1	BM17132	4296	89	89	4243	89	89
PRTG1	BM17132	4297	rerun		4244	87	91
PRTG1	BM17132	4298	87	89	4245	87	89
PRTG1	BM17132	4299	89	89	4246	85	89
PRTG1	BM17132	4300	89	89	4247	85	89
PRTG1	BM17132	4301	87	89	4248	87	89
PRTG1	BM17132	4302	89	95	4249	89	95
PRTG1	BM17132	4303	rerun		4250	85	95
PRTG1	BM17132	4304	89	89	4251	89	89
PRTG1	BM17132	4305	89	89	4252	89	95
PRTG1	BM17132	4306	89	89	4253	87	89
PRTG1	BM17132	4309	89	89	4255	95	95
PRTG1	BM17132	4310	rerun		4256	85	85
PRTG1	BM17132	4311	rerun		4257	91	95
PRTG1	BM17132	4312	89	89	4259	89	91
PRTG1	BM17132	4313	89	89	4260	89	95
PRTG1	BM17132	4314	89	89	4261	85	87
PRTG1	BM17132	4315	87	89	4262	89	89
PRTG1	BM17132	4316	rerun		4263	87	89
PRTG1	BM17132	4317	rerun		4264	89	95
PRTG1	BM17132	4318	85	89	4265	89	89
PRTG1	BMS410	4267	83	89	4213	83	89
PRTG1	BMS410	4268	rerun		4214	83	95
PRTG1	BMS410	4269	83	97	4215	83	97
PRTG1	BMS410	4270	97	97	4216	97	97
PRTG1	BMS410	4271	83	95	4217	83	97
PRTG1	BMS410	4272	rerun		4218	83	97
PRTG1	BMS410	4273	83	97	4219	83	97
PRTG1	BMS410	4274	83	89	4220	83	89
PRTG1	BMS410	4275	83	89	4221	83	97
PRTG1	BMS410	4276	83	89	4222	83	89
PRTG1	BMS410	4277	89	97	4223	89	97
PRTG1	BMS410	4278	83	83	4224	83	83
PRTG1	BMS410	4279	97	97	4225	97	97
PRTG1	BMS410	4280	97	97	4226	97	97
PRTG1	BMS410	4281	83	97	4227	83	97
PRTG1	BMS410	4282	83	97	4228	83	97
PRTG1	BMS410	4283	83	89	4229	83	89
PRTG1	BMS410	4284	83	83	4230	83	83
PRTG1	BMS410	4285	83	97	4231	83	97
PRTG1	BMS410	4286	83	97	4232	83	97
PRTG1	BMS410	4287	rerun		4233	83	97
PRTG1	BMS410	4288	97	97	4234	97	97
PRTG1	BMS410	4289	97	97	4235	97	97
PRTG1	BMS410	4290	83	89	4236	83	97
PRTG1	BMS410	4291	83	83	4237	83	97
PRTG1	BMS410	4292	83	97	4238	83	97
PRTG1	BMS410	4293	83	89	4240	83	89
PRTG1	BMS410	4294	89	89	4241	89	89
PRTG1	BMS410	4295	97	97	4242	97	97
PRTG1	BMS410	4296	83	97	4243	83	97
PRTG1	BMS410	4297	rerun		4244	83	97
PRTG1	BMS410	4298	83	89	4245	83	89
PRTG1	BMS410	4299	83	89	4246	83	89
PRTG1	BMS410	4300	97	97	4247	89	97
PRTG1	BMS410	4301	83	83	4248	83	83
PRTG1	BMS410	4302	89	97	4249	89	97
PRTG1	BMS410	4303	83	89	4250	89	97
PRTG1	BMS410	4304	83	97	4251	83	97
PRTG1	BMS410	4305	97	97	4252	97	97
PRTG1	BMS410	4306	83	89	4253	83	89
PRTG1	BMS410	4309	83	89	4255	83	89
PRTG1	BMS410	4310	83	83	4256	83	83
PRTG1	BMS410	4311	89	97	4257	89	97
PRTG1	BMS410	4312	97	97	4259	97	97
PRTG1	BMS410	4313	89	97	4260	89	97
PRTG1	BMS410	4314	89	97	4261	89	97
PRTG1	BMS410	4315	83	83	4262	83	83
PRTG1	BMS410	4316	rerun		4263	89	97
PRTG1	BMS410	4317	83	89	4264	83	89
PRTG1	BMS410	4318	83	97	4265	83	97
PRTG1	BMS510	4267	94	95	4213	94	95
PRTG1	BMS510	4268	91	95	4214	91	95
PRTG1	BMS510	4269	91	92	4215	91	92
PRTG1	BMS510	4270	91	95	4216	91	95
PRTG1	BMS510	4271	92	94	4217	92	94
PRTG1	BMS510	4272	91	94	4218	91	94
PRTG1	BMS510	4273	91	92	4219	91	92
PRTG1	BMS510	4274	91	91	4220	91	91
PRTG1	BMS510	4275	91	92	4221	91	92
PRTG1	BMS510	4276	92	95	4222	92	95
PRTG1	BMS510	4277	91	92	4223	91	92
PRTG1	BMS510	4278	91	95	4224	91	95
PRTG1	BMS510	4279	91	91	4225	91	91
PRTG1	BMS510	4280	91	92	4226	91	92
PRTG1	BMS510	4281	92	94	4227	92	94
PRTG1	BMS510	4282	91	92	4228	91	92
PRTG1	BMS510	4283	91	92	4229	91	92
PRTG1	BMS510	4284	92	92	4230	91	91
PRTG1	BMS510	4285	92	95	4231	92	95
PRTG1	BMS510	4286	92	92	4232	91	92
PRTG1	BMS510	4287	91	91	4233	91	91
PRTG1	BMS510	4288	92	95	4234	92	95
PRTG1	BMS510	4289	91	91	4235	91	91
PRTG1	BMS510	4290	92	95	4236	92	95
PRTG1	BMS510	4291	91	91	4237	91	91
PRTG1	BMS510	4292	91	95	4238	91	95
PRTG1	BMS510	4293	91	92	4240	91	92
PRTG1	BMS510	4294	91	91	4241	91	91
PRTG1	BMS510	4295	91	92	4242	91	92
PRTG1	BMS510	4296	91	92	4243	91	92
PRTG1	BMS510	4297	91	91	4244	91	91
PRTG1	BMS510	4298	92	92	4245	92	92
PRTG1	BMS510	4299	92	94	4246	92	94
PRTG1	BMS510	4300	94	95	4247	94	95
PRTG1	BMS510	4301	91	92	4248	91	92
PRTG1	BMS510	4302	91	95	4249	91	95
PRTG1	BMS510	4303	91	92	4250	91	92
PRTG1	BMS510	4304	91	92	4251	91	92
PRTG1	BMS510	4305	92	92	4252	92	92
PRTG1	BMS510	4306	92	92	4253	92	92
PRTG1	BMS510	4309	91	92	4255	91	92
PRTG1	BMS510	4310	91	92	4256	91	92
PRTG1	BMS510	4311	91	92	4257	91	92
PRTG1	BMS510	4312	91	91	4259	91	91
PRTG1	BMS510	4313	92	92	4260	92	92
PRTG1	BMS510	4314	94	95	4261	94	95
PRTG1	BMS510	4315	91	92	4262	91	92
PRTG1	BMS510	4316	91	94	4263	91	94
PRTG1	BMS510	4317	95	95	4264	95	95
PRTG1	BMS510	4318	91	94	4265	91	94
PRTG1	BMS527	4267	175	177	4213	175	177
PRTG1	BMS527	4268	175	177	4214	173	177
PRTG1	BMS527	4269	175	175	4215	175	175
PRTG1	BMS527	4270	175	177	4216	173	177
PRTG1	BMS527	4271	175	175	4217	175	175
PRTG1	BMS527	4272	175	175	4218	175	175
PRTG1	BMS527	4273	167	167	4219	167	167
PRTG1	BMS527	4274	173	175	4220	173	175
PRTG1	BMS527	4275	175	175	4221	175	175
PRTG1	BMS527	4276	173	175	4222	173	175
PRTG1	BMS527	4277	173	177	4223	173	177
PRTG1	BMS527	4278	173	175	4224	173	175
PRTG1	BMS527	4279	173	175	4225	173	175
PRTG1	BMS527	4280	173	177	4226	173	177
PRTG1	BMS527	4281	175	175	4227	175	175
PRTG1	BMS527	4282	167	173	4228	rerun
PRTG1	BMS527	4283	177	177	4229	177	177
PRTG1	BMS527	4284	175	177	4230	175	177
PRTG1	BMS527	4285	173	175	4231	173	175
PRTG1	BMS527	4286	rerun		4232	173	173
PRTG1	BMS527	4287	rerun		4233	167	173
PRTG1	BMS527	4288	rerun		4234	163	167
PRTG1	BMS527	4289	rerun		4235	163	175
PRTG1	BMS527	4290	rerun		4236	175	175
PRTG1	BMS527	4291	rerun		4237	175	177
PRTG1	BMS527	4292	rerun		4238	175	175
PRTG1	BMS527	4293	173	175	4240	173	175
PRTG1	BMS527	4294	rerun		4241	175	175
PRTG1	BMS527	4295	rerun		4242	163	167
PRTG1	BMS527	4296	rerun		4243	165	175
PRTG1	BMS527	4297	rerun		4244	175	175
PRTG1	BMS527	4298	rerun		4245	rerun
PRTG1	BMS527	4299	rerun		4246	rerun
PRTG1	BMS527	4300	rerun		4247	rerun
PRTG1	BMS527	4301	175	175	4248	rerun
PRTG1	BMS527	4302	173	175	4249	rerun
PRTG1	BMS527	4303	rerun		4250	173	173
PRTG1	BMS527	4304	167	175	4251	rerun
PRTG1	BMS527	4305	rerun		4252	rerun
PRTG1	BMS527	4306	rerun		4253	rerun
PRTG1	BMS527	4309	rerun		4255	rerun
PRTG1	BMS527	4310	rerun		4256	rerun
PRTG1	BMS527	4311	rerun		4257	rerun
PRTG1	BMS527	4312	rerun		4259	167	167
PRTG1	BMS527	4313	rerun		4260	175	175
PRTG1	BMS527	4314	rerun		4261	175	177
PRTG1	BMS527	4315	rerun		4262	rerun
PRTG1	BMS527	4316	rerun		4263	175	175
PRTG1	BMS527	4317	rerun		4264	rerun
PRTG1	BMS527	4318	rerun		4265	rerun
PRTG1	RM372	4267	130	130	4213	130	130
PRTG1	RM372	4268	130	130	4214	130	132
PRTG1	RM372	4269	134	134	4215	134	134
PRTG1	RM372	4270	134	134	4216	134	134
PRTG1	RM372	4271	130	132	4217	130	132
PRTG1	RM372	4272	130	134	4218	130	134
PRTG1	RM372	4273	134	134	4219	134	134
PRTG1	RM372	4274	118	134	4220	118	134
PRTG1	RM372	4275	118	132	4221	118	132
PRTG1	RM372	4276	130	130	4222	130	130
PRTG1	RM372	4277	134	134	4223	134	134
PRTG1	RM372	4278	132	132	4224	132	132
PRTG1	RM372	4279	134	134	4225	134	134
PRTG1	RM372	4280	130	132	4226	130	132
PRTG1	RM372	4281	130	132	4227	130	132
PRTG1	RM372	4282	134	134	4228	134	134
PRTG1	RM372	4283	134	134	4229	134	134
PRTG1	RM372	4284	134	134	4230	134	134
PRTG1	RM372	4285	130	132	4231	130	132
PRTG1	RM372	4286	130	134	4232	130	134
PRTG1	RM372	4287	130	132	4233	130	132
PRTG1	RM372	4288	128	134	4234	118	134
PRTG1	RM372	4289	126	132	4235	132	134
PRTG1	RM372	4290	130	130	4236	130	130
PRTG1	RM372	4291	132	132	4237	132	132
PRTG1	RM372	4292	130	130	4238	130	130
PRTG1	RM372	4293	118	132	4240	118	132
PRTG1	RM372	4294	132	134	4241	132	134
PRTG1	RM372	4295	132	134	4242	132	134
PRTG1	RM372	4296	130	134	4243	130	134
PRTG1	RM372	4297	130	134	4244	130	134
PRTG1	RM372	4298	130	134	4245	130	134
PRTG1	RM372	4299	118	130	4246	118	130
PRTG1	RM372	4300	130	130	4247	130	130
PRTG1	RM372	4301	130	130	4248	130	130
PRTG1	RM372	4302	132	134	4249	132	134
PRTG1	RM372	4303	130	134	4250	132	134
PRTG1	RM372	4304	132	134	4251	132	134
PRTG1	RM372	4305	118	130	4252	118	130
PRTG1	RM372	4306	130	134	4253	130	134
PRTG1	RM372	4309	134	134	4255	134	134
PRTG1	RM372	4310	118	134	4256	118	134
PRTG1	RM372	4311	132	132	4257	132	134
PRTG1	RM372	4312	132	134	4259	132	134
PRTG1	RM372	4313	130	132	4260	130	132
PRTG1	RM372	4314	132	134	4261	132	134
PRTG1	RM372	4315	130	130	4262	130	130
PRTG1	RM372	4316	130	132	4263	130	132
PRTG1	RM372	4317	132	134	4264	132	134
PRTG1	RM372	4318	130	134	4265	130	134
PRTG2	BM1225	4267	269	269	4213	269	269
PRTG2	BM1225	4268	253	253	4214	253	253
PRTG2	BM1225	4269	241	269	4215	241	269
PRTG2	BM1225	4270	253	269	4216	253	269
PRTG2	BM1225	4271	269	271	4217	269	271
PRTG2	BM1225	4272	241	253	4218	241	253
PRTG2	BM1225	4273	241	271	4219	241	271
PRTG2	BM1225	4274	241	271	4220	241	271
PRTG2	BM1225	4275	271	271	4221	271	271
PRTG2	BM1225	4276	241	271	4222	241	271
PRTG2	BM1225	4277	269	271	4223	269	271
PRTG2	BM1225	4278	253	271	4224	253	271
PRTG2	BM1225	4279	241	271	4225	241	271
PRTG2	BM1225	4280	271	271	4226	271	271
PRTG2	BM1225	4281	241	241	4227	241	241
PRTG2	BM1225	4282	253	271	4228	253	271
PRTG2	BM1225	4283	241	241	4229	241	241
PRTG2	BM1225	4284	253	271	4230	253	271
PRTG2	BM1225	4285	241	271	4231	241	271
PRTG2	BM1225	4286	241	271	4232	241	271
PRTG2	BM1225	4287	271	271	4233	271	271
PRTG2	BM1225	4288	269	271	4234	269	271
PRTG2	BM1225	4289	241	269	4235	241	269
PRTG2	BM1225	4290	241	241	4236	241	241
PRTG2	BM1225	4291	271	271	4237	271	271
PRTG2	BM1225	4292	241	241	4238	241	241
PRTG2	BM1225	4293	241	269	4240	241	269
PRTG2	BM1225	4294	241	271	4241	241	271
PRTG2	BM1225	4295	241	271	4242	241	271
PRTG2	BM1225	4296	241	271	4243	241	271
PRTG2	BM1225	4297	249	271	4244	249	271
PRTG2	BM1225	4298	269	271	4245	269	271
PRTG2	BM1225	4299	241	253	4246	241	253
PRTG2	BM1225	4300	241	269	4247	241	269
PRTG2	BM1225	4301	241	253	4248	241	253
PRTG2	BM1225	4302	241	253	4249	241	253
PRTG2	BM1225	4303	241	253	4250	241	253
PRTG2	BM1225	4304	253	271	4251	253	271
PRTG2	BM1225	4305	241	271	4252	241	271
PRTG2	BM1225	4306	241	241	4253	241	241
PRTG2	BM1225	4309	241	269	4255	241	269
PRTG2	BM1225	4310	253	271	4256	253	271
PRTG2	BM1225	4311	241	271	4257	241	271
PRTG2	BM1225	4312	241	241	4259	241	241
PRTG2	BM1225	4313	241	253	4260	241	253
PRTG2	BM1225	4314	241	269	4261	241	269
PRTG2	BM1225	4315	241	253	4262	241	253
PRTG2	BM1225	4316	253	253	4263	253	253
PRTG2	BM1225	4317	241	271	4264	241	271
PRTG2	BM1225	4318	271	271	4265	271	271
PRTG2	BM1706	4267	238	238	4213	238	238
PRTG2	BM1706	4268	238	238	4214	238	238
PRTG2	BM1706	4269	238	252	4215	238	252
PRTG2	BM1706	4270	238	252	4216	238	252
PRTG2	BM1706	4271	238	238	4217	238	238
PRTG2	BM1706	4272	238	238	4218	238	238
PRTG2	BM1706	4273	238	238	4219	238	238
PRTG2	BM1706	4274	238	238	4220	238	238
PRTG2	BM1706	4275	238	238	4221	238	238
PRTG2	BM1706	4276	238	254	4222	238	254
PRTG2	BM1706	4277	238	238	4223	238	238
PRTG2	BM1706	4278	238	238	4224	238	238
PRTG2	BM1706	4279	238	238	4225	238	238
PRTG2	BM1706	4280	238	252	4226	238	252
PRTG2	BM1706	4281	238	238	4227	238	238
PRTG2	BM1706	4282	238	238	4228	238	238
PRTG2	BM1706	4283	232	252	4229	232	252
PRTG2	BM1706	4284	252	254	4230	252	254
PRTG2	BM1706	4285	238	238	4231	238	238
PRTG2	BM1706	4286	238	238	4232	238	238
PRTG2	BM1706	4287	238	238	4233	238	238
PRTG2	BM1706	4288	238	252	4234	238	252
PRTG2	BM1706	4289	238	238	4235	238	238
PRTG2	BM1706	4290	238	238	4236	238	238
PRTG2	BM1706	4291	238	252	4237	238	252
PRTG2	BM1706	4292	232	238	4238	232	238
PRTG2	BM1706	4293	238	238	4240	238	238
PRTG2	BM1706	4294	232	238	4241	232	238
PRTG2	BM1706	4295	238	238	4242	238	238
PRTG2	BM1706	4296	238	252	4243	238	252
PRTG2	BM1706	4297	252	254	4244	252	254
PRTG2	BM1706	4298	238	238	4245	238	238
PRTG2	BM1706	4299	238	238	4246	238	238
PRTG2	BM1706	4300	238	252	4247	238	252
PRTG2	BM1706	4301	232	252	4248	232	252
PRTG2	BM1706	4302	238	252	4249	238	252
PRTG2	BM1706	4303	238	254	4250	238	254
PRTG2	BM1706	4304	232	238	4251	232	238
PRTG2	BM1706	4305	232	238	4252	232	238
PRTG2	BM1706	4306	238	252	4253	238	252
PRTG2	BM1706	4309	238	252	4255	238	252
PRTG2	BM1706	4310	238	238	4256	238	238
PRTG2	BM1706	4311	238	238	4257	238	238
PRTG2	BM1706	4312	238	238	4259	238	238
PRTG2	BM1706	4313	238	252	4260	238	252
PRTG2	BM1706	4314	238	252	4261	238	252
PRTG2	BM1706	4315	238	252	4262	238	252
PRTG2	BM1706	4316	238	238	4263	238	238
PRTG2	BM1706	4317	238	252	4264	238	252
PRTG2	BM1706	4318	238	238	4265	238	238
PRTG2	BM1905	4267	176	176	4213	176	176
PRTG2	BM1905	4268	176	176	4214	176	176
PRTG2	BM1905	4269	176	176	4215	176	176
PRTG2	BM1905	4270	176	176	4216	176	176
PRTG2	BM1905	4271	172	176	4217	172	176
PRTG2	BM1905	4272	176	182	4218	176	182
PRTG2	BM1905	4273	176	176	4219	176	176
PRTG2	BM1905	4274	176	182	4220	176	182
PRTG2	BM1905	4275	176	176	4221	176	176
PRTG2	BM1905	4276	176	176	4222	176	176
PRTG2	BM1905	4277	176	178	4223	176	176
PRTG2	BM1905	4278	176	176	4224	176	176
PRTG2	BM1905	4279	176	176	4225	176	176
PRTG2	BM1905	4280	176	176	4226	176	176
PRTG2	BM1905	4281	176	176	4227	176	176
PRTG2	BM1905	4282	176	176	4228	176	176
PRTG2	BM1905	4283	176	176	4229	176	176
PRTG2	BM1905	4284	176	176	4230	176	176
PRTG2	BM1905	4285	176	176	4231	176	176
PRTG2	BM1905	4286	172	176	4232	172	176
PRTG2	BM1905	4287	176	176	4233	176	176
PRTG2	BM1905	4288	176	176	4234	176	176
PRTG2	BM1905	4289	176	176	4235	176	176
PRTG2	BM1905	4290	176	176	4236	176	176
PRTG2	BM1905	4291	176	182	4237	176	182
PRTG2	BM1905	4292	172	176	4238	172	176
PRTG2	BM1905	4293	176	182	4240	176	182
PRTG2	BM1905	4294	176	176	4241	176	176
PRTG2	BM1905	4295	176	182	4242	176	182
PRTG2	BM1905	4296	176	176	4243	176	176
PRTG2	BM1905	4297	172	176	4244	172	176
PRTG2	BM1905	4298	176	176	4245	176	176
PRTG2	BM1905	4299	176	182	4246	176	182
PRTG2	BM1905	4300	176	176	4247	176	176
PRTG2	BM1905	4301	176	182	4248	176	182
PRTG2	BM1905	4302	176	176	4249	176	176
PRTG2	BM1905	4303	176	176	4250	176	176
PRTG2	BM1905	4304	176	176	4251	176	176
PRTG2	BM1905	4305	176	182	4252	176	182
PRTG2	BM1905	4306	176	182	4253	176	182
PRTG2	BM1905	4309	172	176	4255	172	176
PRTG2	BM1905	4310	176	176	4256	176	176
PRTG2	BM1905	4311	176	176	4257	176	176
PRTG2	BM1905	4312	172	176	4259	172	176
PRTG2	BM1905	4313	176	176	4260	176	176
PRTG2	BM1905	4314	176	182	4261	176	182
PRTG2	BM1905	4315	176	182	4262	176	182
PRTG2	BM1905	4316	176	182	4263	176	182
PRTG2	BM1905	4317	176	182	4264	176	182
PRTG2	BM1905	4318	176	176	4265	176	176
PRTG2	BM2113	4267	133	143	4213	133	143
PRTG2	BM2113	4268	129	143	4214	129	143
PRTG2	BM2113	4269	133	143	4215	133	143
PRTG2	BM2113	4270	133	143	4216	133	143
PRTG2	BM2113	4271	143	143	4217	143	143
PRTG2	BM2113	4272	143	143	4218	143	143
PRTG2	BM2113	4273	143	143	4219	143	143
PRTG2	BM2113	4274	129	143	4220	129	143
PRTG2	BM2113	4275	143	149	4221	143	149
PRTG2	BM2113	4276	129	149	4222	129	149
PRTG2	BM2113	4277	143	143	4223	143	143
PRTG2	BM2113	4278	133	143	4224	133	143
PRTG2	BM2113	4279	143	143	4225	143	143
PRTG2	BM2113	4280	143	143	4226	143	143
PRTG2	BM2113	4281	143	143	4227	143	143
PRTG2	BM2113	4282	133	143	4228	133	143
PRTG2	BM2113	4283	143	143	4229	143	143
PRTG2	BM2113	4284	133	143	4230	133	143
PRTG2	BM2113	4285	129	143	4231	129	143
PRTG2	BM2113	4286	129	143	4232	129	143
PRTG2	BM2113	4287	129	143	4233	129	143
PRTG2	BM2113	4288	143	143	4234	143	143
PRTG2	BM2113	4289	129	143	4235	143	143
PRTG2	BM2113	4290	143	143	4236	143	143
PRTG2	BM2113	4291	129	143	4237	129	143
PRTG2	BM2113	4292	143	143	4238	143	143
PRTG2	BM2113	4293	133	143	4240	133	143
PRTG2	BM2113	4294	143	149	4241	143	149
PRTG2	BM2113	4295	129	143	4242	129	143
PRTG2	BM2113	4296	129	143	4243	129	143
PRTG2	BM2113	4297	133	143	4244	133	143
PRTG2	BM2113	4298	129	143	4245	129	143
PRTG2	BM2113	4299	143	143	4246	143	143
PRTG2	BM2113	4300	143	143	4247	143	143
PRTG2	BM2113	4301	129	143	4248	129	143
PRTG2	BM2113	4302	129	143	4249	129	143
PRTG2	BM2113	4303	129	143	4250	129	143
PRTG2	BM2113	4304	129	143	4251	129	143
PRTG2	BM2113	4305	143	149	4252	143	149
PRTG2	BM2113	4306	129	143	4253	129	143
PRTG2	BM2113	4309	143	149	4255	143	149
PRTG2	BM2113	4310	129	149	4256	129	149
PRTG2	BM2113	4311	129	149	4257	129	149
PRTG2	BM2113	4312	143	143	4259	129	143
PRTG2	BM2113	4313	143	143	4260	143	143
PRTG2	BM2113	4314	143	149	4261	143	149
PRTG2	BM2113	4315	143	143	4262	143	143
PRTG2	BM2113	4316	129	143	4263	129	143
PRTG2	BM2113	4317	143	143	4264	143	143
PRTG2	BM2113	4318	129	129	4265	129	129
PRTG2	BM4440	4267	125	125	4213	125	125
PRTG2	BM4440	4268	125	127	4214	125	127
PRTG2	BM4440	4269	127	129	4215	127	129
PRTG2	BM4440	4270	125	125	4216	125	125
PRTG2	BM4440	4271	123	125	4217	123	123
PRTG2	BM4440	4272	127	131	4218	127	131
PRTG2	BM4440	4273	127	129	4219	127	129
PRTG2	BM4440	4274	129	129	4220	129	129
PRTG2	BM4440	4275	127	129	4221	127	129
PRTG2	BM4440	4276	125	125	4222	125	125
PRTG2	BM4440	4277	125	125	4223	125	125
PRTG2	BM4440	4278	123	127	4224	123	127
PRTG2	BM4440	4279	125	129	4225	125	129
PRTG2	BM4440	4280	125	125	4226	125	125
PRTG2	BM4440	4281	129	129	4227	129	129
PRTG2	BM4440	4282	125	127	4228	125	127
PRTG2	BM4440	4283	127	129	4229	127	129
PRTG2	BM4440	4284	129	129	4230	127	129
PRTG2	BM4440	4285	125	125	4231	125	125
PRTG2	BM4440	4286	125	127	4232	125	127
PRTG2	BM4440	4287	125	129	4233	125	129
PRTG2	BM4440	4288	129	129	4234	125	129
PRTG2	BM4440	4289	125	129	4235	125	129
PRTG2	BM4440	4290	125	125	4236	125	125
PRTG2	BM4440	4291	125	125	4237	125	125
PRTG2	BM4440	4292	129	129	4238	129	129
PRTG2	BM4440	4293	125	125	4240	125	125
PRTG2	BM4440	4294	125	127	4241	125	127
PRTG2	BM4440	4295	125	125	4242	125	125
PRTG2	BM4440	4296	127	127	4243	127	127
PRTG2	BM4440	4297	125	129	4244	125	129
PRTG2	BM4440	4298	123	125	4245	123	125
PRTG2	BM4440	4299	127	129	4246	127	129
PRTG2	BM4440	4300	127	127	4247	127	129
PRTG2	BM4440	4301	129	129	4248	125	129
PRTG2	BM4440	4302	127	127	4249	127	127
PRTG2	BM4440	4303	125	127	4250	125	127
PRTG2	BM4440	4304	125	125	4251	125	125
PRTG2	BM4440	4305	125	125	4252	125	125
PRTG2	BM4440	4306	127	127	4253	127	127
PRTG2	BM4440	4309	125	125	4255	125	125
PRTG2	BM4440	4310	125	127	4256	125	127
PRTG2	BM4440	4311	123	127	4257	123	125
PRTG2	BM4440	4312	125	129	4259	125	129
PRTG2	BM4440	4313	125	127	4260	125	127
PRTG2	BM4440	4314	125	129	4261	125	129
PRTG2	BM4440	4315	123	125	4262	123	125
PRTG2	BM4440	4316	125	127	4263	125	127
PRTG2	BM4440	4317	125	127	4264	125	127
PRTG2	BM4440	4318	127	127	4265	127	127
PRTG2	BM720	4267	231	233	4213	231	233
PRTG2	BM720	4268	231	231	4214	225	231
PRTG2	BM720	4269	225	235	4215	225	235
PRTG2	BM720	4270	229	231	4216	229	231
PRTG2	BM720	4271	235	235	4217	229	235
PRTG2	BM720	4272	213	229	4218	213	229
PRTG2	BM720	4273	225	225	4219	225	225
PRTG2	BM720	4274	225	231	4220	225	231
PRTG2	BM720	4275	213	213	4221	213	213
PRTG2	BM720	4276	225	235	4222	225	235
PRTG2	BM720	4277	225	235	4223	225	233
PRTG2	BM720	4278	229	231	4224	229	231
PRTG2	BM720	4279	229	229	4225	229	229
PRTG2	BM720	4280	223	233	4226	225	233
PRTG2	BM720	4281	229	231	4227	229	231
PRTG2	BM720	4282	213	231	4228	213	231
PRTG2	BM720	4283	213	231	4229	213	231
PRTG2	BM720	4284	231	231	4230	231	231
PRTG2	BM720	4285	229	231	4231	229	231
PRTG2	BM720	4286	231	231	4232	231	231
PRTG2	BM720	4287	213	227	4233	213	229
PRTG2	BM720	4288	213	229	4234	213	229
PRTG2	BM720	4289	231	231	4235	231	231
PRTG2	BM720	4290	231	231	4236	213	231
PRTG2	BM720	4291	225	231	4237	225	231
PRTG2	BM720	4292	rerun		4238	229	229
PRTG2	BM720	4293	231	231	4240	231	231
PRTG2	BM720	4294	213	225	4241	213	225
PRTG2	BM720	4295	rerun		4242	229	235
PRTG2	BM720	4296	213	225	4243	213	225
PRTG2	BM720	4297	213	231	4244	213	231
PRTG2	BM720	4298	213	231	4245	213	231
PRTG2	BM720	4299	213	231	4246	213	231
PRTG2	BM720	4300	225	225	4247	225	225
PRTG2	BM720	4301	225	225	4248	225	225
PRTG2	BM720	4302	225	225	4249	225	225
PRTG2	BM720	4303	213	213	4250	213	231
PRTG2	BM720	4304	231	231	4251	231	231
PRTG2	BM720	4305	213	231	4252	213	231
PRTG2	BM720	4306	213	213	4253	213	213
PRTG2	BM720	4309	231	231	4255	231	231
PRTG2	BM720	4310	231	233	4256	231	233
PRTG2	BM720	4311	229	229	4257	229	229
PRTG2	BM720	4312	229	229	4259	229	231
PRTG2	BM720	4313	213	229	4260	213	229
PRTG2	BM720	4314	231	231	4261	231	231
PRTG2	BM720	4315	231	231	4262	231	231
PRTG2	BM720	4316	213	233	4263	rerun
PRTG2	BM720	4317	231	233	4264	231	233
PRTG2	BM720	4318	229	229	4265	229	229
PRTY A	BM4513	4267	132	132	4213	132	132
PRTY A	BM4513	4268	132	132	4214	132	132
PRTY A	BM4513	4269	132	134	4215	132	134
PRTY A	BM4513	4270	132	132	4216	132	132
PRTY A	BM4513	4271	132	132	4217	132	132
PRTY A	BM4513	4272	132	132	4218	132	132
PRTY A	BM4513	4273	132	132	4219	132	132
PRTY A	BM4513	4274	132	132	4220	132	132
PRTY A	BM4513	4275	132	134	4221	132	134
PRTY A	BM4513	4276	132	132	4222	132	132
PRTY A	BM4513	4277	132	132	4223	132	132
PRTY A	BM4513	4278	132	132	4224	132	132
PRTY A	BM4513	4279	132	132	4225	132	132
PRTY A	BM4513	4280	132	132	4226	132	132
PRTY A	BM4513	4281	132	134	4227	132	134
PRTY A	BM4513	4282	132	134	4228	132	134
PRTY A	BM4513	4283	132	132	4229	132	132
PRTY A	BM4513	4284	134	134	4230	134	134
PRTY A	BM4513	4285	132	132	4231	132	132
PRTY A	BM4513	4286	132	132	4232	132	132
PRTY A	BM4513	4287	132	132	4233	132	132
PRTY A	BM4513	4288	132	132	4234	132	132
PRTY A	BM4513	4289	132	132	4235	132	132
PRTY A	BM4513	4290	132	134	4236	132	134
PRTY A	BM4513	4291	132	134	4237	132	134
PRTY A	BM4513	4292	132	132	4238	132	132
PRTY A	BM4513	4293	132	132	4240	132	132
PRTY A	BM4513	4294	132	132	4241	132	132
PRTY A	BM4513	4295	132	132	4242	132	132
PRTY A	BM4513	4296	132	132	4243	132	132
PRTY A	BM4513	4297	132	132	4244	132	132
PRTY A	BM4513	4298	132	132	4245	132	132
PRTY A	BM4513	4299	132	134	4246	132	134
PRTY A	BM4513	4300	132	132	4247	132	132
PRTY A	BM4513	4301	132	132	4248	132	132
PRTY A	BM4513	4302	132	132	4249	132	132
PRTY A	BM4513	4303	132	132	4250	132	132
PRTY A	BM4513	4304	132	132	4251	132	132
PRTY A	BM4513	4305	132	132	4252	132	132
PRTY A	BM4513	4306	132	134	4253	132	134
PRTY A	BM4513	4309	132	132	4255	132	132
PRTY A	BM4513	4310	132	132	4256	132	132
PRTY A	BM4513	4311	132	132	4257	132	132
PRTY A	BM4513	4312	132	132	4259	132	132
PRTY A	BM4513	4313	rerun		4260	132	132
PRTY A	BM4513	4314	132	132	4261	132	132
PRTY A	BM4513	4315	132	132	4262	132	132
PRTY A	BM4513	4316	132	132	4263	132	132
PRTY A	BM4513	4317	132	132	4264	132	132
PRTY A	BM4513	4318	134	134	4265	134	134
PRTY A	BM7145	4267	110	110	4213	110	110
PRTY A	BM7145	4268	108	108	4214	108	108
PRTY A	BM7145	4269	108	108	4215	108	108
PRTY A	BM7145	4270	108	108	4216	108	108
PRTY A	BM7145	4271	108	108	4217	108	108
PRTY A	BM7145	4272	108	108	4218	108	108
PRTY A	BM7145	4273	108	108	4219	108	108
PRTY A	BM7145	4274	108	108	4220	108	108
PRTY A	BM7145	4275	108	108	4221	108	108
PRTY A	BM7145	4276	108	110	4222	108	110
PRTY A	BM7145	4277	108	108	4223	108	108
PRTY A	BM7145	4278	108	110	4224	108	110
PRTY A	BM7145	4279	108	110	4225	108	110
PRTY A	BM7145	4280	108	110	4226	108	110
PRTY A	BM7145	4281	108	108	4227	108	108
PRTY A	BM7145	4282	108	108	4228	108	108
PRTY A	BM7145	4283	108	108	4229	108	108
PRTY A	BM7145	4284	108	110	4230	108	110
PRTY A	BM7145	4285	108	110	4231	108	110
PRTY A	BM7145	4286	108	108	4232	108	108
PRTY A	BM7145	4287	108	110	4233	108	110
PRTY A	BM7145	4288	108	110	4234	108	110
PRTY A	BM7145	4289	108	108	4235	108	108
PRTY A	BM7145	4290	108	110	4236	108	110
PRTY A	BM7145	4291	108	108	4237	108	108
PRTY A	BM7145	4292	108	108	4238	108	108
PRTY A	BM7145	4293	108	108	4240	108	108
PRTY A	BM7145	4294	108	110	4241	108	110
PRTY A	BM7145	4295	108	108	4242	108	108
PRTY A	BM7145	4296	108	108	4243	108	108
PRTY A	BM7145	4297	108	108	4244	108	108
PRTY A	BM7145	4298	108	110	4245	108	110
PRTY A	BM7145	4299	108	108	4246	108	108
PRTY A	BM7145	4300	108	108	4247	108	108
PRTY A	BM7145	4301	108	108	4248	108	108
PRTY A	BM7145	4302	108	108	4249	108	108
PRTY A	BM7145	4303	108	108	4250	108	108
PRTY A	BM7145	4304	108	108	4251	108	108
PRTY A	BM7145	4305	108	110	4252	108	110
PRTY A	BM7145	4306	108	108	4253	108	108
PRTY A	BM7145	4309	108	108	4255	108	108
PRTY A	BM7145	4310	108	110	4256	108	110
PRTY A	BM7145	4311	108	108	4257	108	108
PRTY A	BM7145	4312	108	110	4259	108	110
PRTY A	BM7145	4313	108	108	4260	108	108
PRTY A	BM7145	4314	108	108	4261	108	108
PRTY A	BM7145	4315	108	108	4262	108	108
PRTY A	BM7145	4316	108	108	4263	108	108
PRTY A	BM7145	4317	108	108	4264	108	108
PRTY A	BM7145	4318	108	110	4265	108	110
PRTY A	BMS2270	4267	66	68	4213	66	68
PRTY A	BMS2270	4268	rerun		4214	68	68
PRTY A	BMS2270	4269	rerun		4215	66	68
PRTY A	BMS2270	4270	rerun		4216	68	68
PRTY A	BMS2270	4271	rerun		4217	66	68
PRTY A	BMS2270	4272	68	68	4218	68	68
PRTY A	BMS2270	4273	66	68	4219	66	68
PRTY A	BMS2270	4274	66	68	4220	66	68
PRTY A	BMS2270	4275	66	68	4221	66	68
PRTY A	BMS2270	4276	66	68	4222	66	68
PRTY A	BMS2270	4277	66	68	4223	66	68
PRTY A	BMS2270	4278	68	68	4224	68	68
PRTY A	BMS2270	4279	68	68	4225	68	68
PRTY A	BMS2270	4280	66	68	4226	66	68
PRTY A	BMS2270	4281	66	68	4227	66	68
PRTY A	BMS2270	4282	68	68	4228	68	68
PRTY A	BMS2270	4283	68	68	4229	68	68
PRTY A	BMS2270	4284	68	68	4230	68	68
PRTY A	BMS2270	4285	66	68	4231	66	68
PRTY A	BMS2270	4286	66	68	4232	66	68
PRTY A	BMS2270	4287	66	68	4233	66	68
PRTY A	BMS2270	4288	rerun		4234	66	66
PRTY A	BMS2270	4289	66	66	4235	66	68
PRTY A	BMS2270	4290	rerun		4236	66	68
PRTY A	BMS2270	4291	rerun		4237	66	68
PRTY A	BMS2270	4292	66	68	4238	66	68
PRTY A	BMS2270	4293	68	68	4240	68	68
PRTY A	BMS2270	4294	66	68	4241	66	68
PRTY A	BMS2270	4295	rerun		4242	66	66
PRTY A	BMS2270	4296	66	68	4243	66	68
PRTY A	BMS2270	4297	66	68	4244	66	68
PRTY A	BMS2270	4298	68	68	4245	68	68
PRTY A	BMS2270	4299	66	68	4246	66	68
PRTY A	BMS2270	4300	66	68	4247	66	68
PRTY A	BMS2270	4301	66	68	4248	66	68
PRTY A	BMS2270	4302	68	68	4249	68	68
PRTY A	BMS2270	4303	66	68	4250	66	68
PRTY A	BMS2270	4304	66	68	4251	66	68
PRTY A	BMS2270	4305	66	68	4252	66	68
PRTY A	BMS2270	4306	66	68	4253	66	68
PRTY A	BMS2270	4309	66	68	4255	66	68
PRTY A	BMS2270	4310	68	68	4256	66	68
PRTY A	BMS2270	4311	68	68	4257	68	68
PRTY A	BMS2270	4312	68	68	4259	68	68
PRTY A	BMS2270	4313	68	68	4260	68	68
PRTY A	BMS2270	4314	66	68	4261	66	68
PRTY A	BMS2270	4315	68	68	4262	68	68
PRTY A	BMS2270	4316	66	66	4263	66	66
PRTY A	BMS2270	4317	66	68	4264	66	68
PRTY A	BMS2270	4318	66	66	4265	66	66
PRTY A	SPS113	4267	130	130	4213	130	130
PRTY A	SPS113	4268	132	132	4214	130	132
PRTY A	SPS113	4269	132	132	4215	132	132
PRTY A	SPS113	4270	130	132	4216	130	132
PRTY A	SPS113	4271	130	132	4217	130	132
PRTY A	SPS113	4272	130	130	4218	130	130
PRTY A	SPS113	4273	132	132	4219	132	132
PRTY A	SPS113	4274	130	130	4220	130	130
PRTY A	SPS113	4275	130	132	4221	130	132
PRTY A	SPS113	4276	130	130	4222	130	130
PRTY A	SPS113	4277	130	130	4223	130	130
PRTY A	SPS113	4278	132	132	4224	132	132
PRTY A	SPS113	4279	130	132	4225	130	132
PRTY A	SPS113	4280	130	132	4226	130	132
PRTY A	SPS113	4281	130	132	4227	130	132
PRTY A	SPS113	4282	132	132	4228	132	132
PRTY A	SPS113	4283	132	132	4229	132	132
PRTY A	SPS113	4284	130	132	4230	130	132
PRTY A	SPS113	4285	132	132	4231	132	132
PRTY A	SPS113	4286	130	130	4232	130	130
PRTY A	SPS113	4287	130	132	4233	130	132
PRTY A	SPS113	4288	132	132	4234	132	132
PRTY A	SPS113	4289	130	132	4235	130	132
PRTY A	SPS113	4290	132	132	4236	132	132
PRTY A	SPS113	4291	132	132	4237	132	132
PRTY A	SPS113	4292	132	132	4238	132	132
PRTY A	SPS113	4293	130	130	4240	130	130
PRTY A	SPS113	4294	130	132	4241	130	132
PRTY A	SPS113	4295	130	130	4242	130	130
PRTY A	SPS113	4296	130	132	4243	130	132
PRTY A	SPS113	4297	132	132	4244	132	132
PRTY A	SPS113	4298	130	132	4245	130	132
PRTY A	SPS113	4299	130	132	4246	130	132
PRTY A	SPS113	4300	130	132	4247	130	132
PRTY A	SPS113	4301	130	132	4248	130	132
PRTY A	SPS113	4302	130	132	4249	130	132
PRTY A	SPS113	4303	130	132	4250	130	132
PRTY A	SPS113	4304	130	132	4251	130	132
PRTY A	SPS113	4305	130	132	4252	130	132
PRTY A	SPS113	4306	132	132	4253	132	132
PRTY A	SPS113	4309	130	132	4255	130	132
PRTY A	SPS113	4310	132	132	4256	132	132
PRTY A	SPS113	4311	132	132	4257	132	132
PRTY A	SPS113	4312	132	132	4259	132	132
PRTY A	SPS113	4313	132	132	4260	132	132
PRTY A	SPS113	4314	130	132	4261	130	132
PRTY A	SPS113	4315	130	132	4262	130	132
PRTY A	SPS113	4316	130	130	4263	130	130
PRTY A	SPS113	4317	132	132	4264	132	132
PRTY A	SPS113	4318	132	132	4265	132	132
PRTY BC	BM4307	4267	185	185	4213	185	185
PRTY BC	BM4307	4268	185	185	4214	185	185
PRTY BC	BM4307	4269	185	185	4215	185	185
PRTY BC	BM4307	4270	185	185	4216	185	185
PRTY BC	BM4307	4271	185	185	4217	185	185
PRTY BC	BM4307	4272	185	185	4218	185	185
PRTY BC	BM4307	4273	185	185	4219	185	185
PRTY BC	BM4307	4274	185	185	4220	185	185
PRTY BC	BM4307	4275	185	185	4221	185	185
PRTY BC	BM4307	4276	185	185	4222	185	185
PRTY BC	BM4307	4277	185	185	4223	185	185
PRTY BC	BM4307	4278	185	185	4224	185	185
PRTY BC	BM4307	4279	185	185	4225	185	185
PRTY BC	BM4307	4280	185	185	4226	185	185
PRTY BC	BM4307	4281	185	185	4227	185	185
PRTY BC	BM4307	4282	185	185	4228	185	185
PRTY BC	BM4307	4283	185	185	4229	185	185
PRTY BC	BM4307	4284	185	185	4230	185	185
PRTY BC	BM4307	4285	185	185	4231	185	185
PRTY BC	BM4307	4286	185	185	4232	185	185
PRTY BC	BM4307	4287	185	185	4233	185	185
PRTY BC	BM4307	4288	185	185	4234	185	185
PRTY BC	BM4307	4289	185	185	4235	185	185
PRTY BC	BM4307	4290	185	185	4236	185	185
PRTY BC	BM4307	4291	185	185	4237	185	185
PRTY BC	BM4307	4292	185	185	4238	185	185
PRTY BC	BM4307	4293	185	185	4240	185	185
PRTY BC	BM4307	4294	185	185	4241	185	185
PRTY BC	BM4307	4295	185	185	4242	185	185
PRTY BC	BM4307	4296	185	185	4243	185	185
PRTY BC	BM4307	4297	185	185	4244	185	185
PRTY BC	BM4307	4298	185	185	4245	185	185
PRTY BC	BM4307	4299	185	185	4246	185	185
PRTY BC	BM4307	4300	185	185	4247	185	185
PRTY BC	BM4307	4301	185	185	4248	185	185
PRTY BC	BM4307	4302	185	185	4249	185	185
PRTY BC	BM4307	4303	185	185	4250	185	185
PRTY BC	BM4307	4304	185	185	4251	185	185
PRTY BC	BM4307	4305	185	185	4252	185	185
PRTY BC	BM4307	4306	185	185	4253	185	185
PRTY BC	BM4307	4309	185	185	4255	185	185
PRTY BC	BM4307	4310	185	185	4256	185	185
PRTY BC	BM4307	4311	185	185	4257	185	185
PRTY BC	BM4307	4312	185	185	4259	185	185
PRTY BC	BM4307	4313	185	185	4260	185	185
PRTY BC	BM4307	4314	185	185	4261	185	185
PRTY BC	BM4307	4315	185	185	4262	185	185
PRTY BC	BM4307	4316	185	185	4263	185	185
PRTY BC	BM4307	4317	185	185	4264	185	185
PRTY BC	BM4307	4318	185	185	4265	185	185
PRTY BC	AGLA293	4267	218	218	4213	218	218
PRTY BC	AGLA293	4268	218	218	4214	218	218
PRTY BC	AGLA293	4269	218	218	4215	218	218
PRTY BC	AGLA293	4270	218	218	4216	218	218
PRTY BC	AGLA293	4271	218	218	4217	218	218
PRTY BC	AGLA293	4272	218	218	4218	218	218
PRTY BC	AGLA293	4273	218	218	4219	218	218
PRTY BC	AGLA293	4274	218	218	4220	218	218
PRTY BC	AGLA293	4275	218	218	4221	218	218
PRTY BC	AGLA293	4276	218	218	4222	218	218
PRTY BC	AGLA293	4277	218	218	4223	218	218
PRTY BC	AGLA293	4278	218	218	4224	218	218
PRTY BC	AGLA293	4279	218	218	4225	218	218
PRTY BC	AGLA293	4280	218	218	4226	218	218
PRTY BC	AGLA293	4281	218	218	4227	218	218
PRTY BC	AGLA293	4282	218	218	4228	218	218
PRTY BC	AGLA293	4283	218	218	4229	218	218
PRTY BC	AGLA293	4284	218	218	4230	218	218
PRTY BC	AGLA293	4285	218	218	4231	218	218
PRTY BC	AGLA293	4286	218	218	4232	218	218
PRTY BC	AGLA293	4287	rerun		4233	218	218
PRTY BC	AGLA293	4288	218	218	4234	218	218
PRTY BC	AGLA293	4289	218	218	4235	218	218
PRTY BC	AGLA293	4290	218	218	4236	218	218
PRTY BC	AGLA293	4291	218	218	4237	218	218
PRTY BC	AGLA293	4292	218	218	4238	218	218
PRTY BC	AGLA293	4293	218	218	4240	218	218
PRTY BC	AGLA293	4294	218	218	4241	218	218
PRTY BC	AGLA293	4295	218	218	4242	218	218
PRTY BC	AGLA293	4296	218	218	4243	218	218
PRTY BC	AGLA293	4297	218	218	4244	218	218
PRTY BC	AGLA293	4298	218	218	4245	218	218
PRTY BC	AGLA293	4299	218	218	4246	218	218
PRTY BC	AGLA293	4300	218	218	4247	218	218
PRTY BC	AGLA293	4301	218	218	4248	218	218
PRTY BC	AGLA293	4302	218	218	4249	218	218
PRTY BC	AGLA293	4303	218	218	4250	218	218
PRTY BC	AGLA293	4304	218	218	4251	218	218
PRTY BC	AGLA293	4305	218	218	4252	218	218
PRTY BC	AGLA293	4306	218	218	4253	218	218
PRTY BC	AGLA293	4309	218	218	4255	218	218
PRTY BC	AGLA293	4310	218	218	4256	218	218
PRTY BC	AGLA293	4311	218	218	4257	218	218
PRTY BC	AGLA293	4312	218	218	4259	218	218
PRTY BC	AGLA293	4313	218	218	4260	218	218
PRTY BC	AGLA293	4314	218	218	4261	218	218
PRTY BC	AGLA293	4315	218	218	4262	218	218
PRTY BC	AGLA293	4316	218	218	4263	218	218
PRTY BC	AGLA293	4317	218	218	4264	218	218
PRTY BC	AGLA293	4318	218	218	4265	218	218
PRTY BC	CSSM42	4267	167	171	4213	167	171
PRTY BC	CSSM42	4268	167	169	4214	167	169
PRTY BC	CSSM42	4269	167	169	4215	167	169
PRTY BC	CSSM42	4270	171	171	4216	171	171
PRTY BC	CSSM42	4271	167	171	4217	167	171
PRTY BC	CSSM42	4272	167	171	4218	167	171
PRTY BC	CSSM42	4273	167	167	4219	167	167
PRTY BC	CSSM42	4274	167	171	4220	167	171
PRTY BC	CSSM42	4275	167	171	4221	167	171
PRTY BC	CSSM42	4276	167	171	4222	167	171
PRTY BC	CSSM42	4277	167	167	4223	167	167
PRTY BC	CSSM42	4278	167	171	4224	167	171
PRTY BC	CSSM42	4279	167	167	4225	167	167
PRTY BC	CSSM42	4280	171	171	4226	171	171
PRTY BC	CSSM42	4281	167	167	4227	167	167
PRTY BC	CSSM42	4282	167	171	4228	167	171
PRTY BC	CSSM42	4283	167	171	4229	167	171
PRTY BC	CSSM42	4284	167	171	4230	167	171
PRTY BC	CSSM42	4285	167	167	4231	167	167
PRTY BC	CSSM42	4286	167	167	4232	167	167
PRTY BC	CSSM42	4287	171	171	4233	171	171
PRTY BC	CSSM42	4288	167	171	4234	167	171
PRTY BC	CSSM42	4289	167	167	4235	167	167
PRTY BC	CSSM42	4290	167	169	4236	167	169
PRTY BC	CSSM42	4291	169	171	4237	169	171
PRTY BC	CSSM42	4292	167	169	4238	167	169
PRTY BC	CSSM42	4293	167	167	4240	167	167
PRTY BC	CSSM42	4294	167	167	4241	167	167
PRTY BC	CSSM42	4295	167	171	4242	167	171
PRTY BC	CSSM42	4296	167	169	4243	167	169
PRTY BC	CSSM42	4297	167	171	4244	167	171
PRTY BC	CSSM42	4298	167	169	4245	167	169
PRTY BC	CSSM42	4299	171	171	4246	171	171
PRTY BC	CSSM42	4300	167	171	4247	167	171
PRTY BC	CSSM42	4301	169	171	4248	169	171
PRTY BC	CSSM42	4302	167	171	4249	167	171
PRTY BC	CSSM42	4303	167	167	4250	167	167
PRTY BC	CSSM42	4304	171	171	4251	171	171
PRTY BC	CSSM42	4305	167	171	4252	167	171
PRTY BC	CSSM42	4306	167	169	4253	167	169
PRTY BC	CSSM42	4309	167	167	4255	167	167
PRTY BC	CSSM42	4310	167	167	4256	167	167
PRTY BC	CSSM42	4311	171	171	4257	171	171
PRTY BC	CSSM42	4312	171	171	4259	171	171
PRTY BC	CSSM42	4313	167	171	4260	167	171
PRTY BC	CSSM42	4314	167	167	4261	167	167
PRTY BC	CSSM42	4315	167	169	4262	167	169
PRTY BC	CSSM42	4316	167	171	4263	167	171
PRTY BC	CSSM42	4317	167	169	4264	167	169
PRTY BC	CSSM42	4318	167	167	4265	167	167
